# Supplementary material for: Miniature Transposable Sequences Are Frequently Mobilized in the Bacterial Plant Pathogen Pseudomonas syringae pv. phaseolicola
Source: PLoS One. 2011 Oct 10;6(10):e25773. doi: 10.1371/journal.pone.0025773 (PMC3189936; doi:10.1371/journal.pone.0025773)
Supplement: Annotation File S1 — Annotation of insertion sequences, and fragments thereof larger than 200 nt, and MITEs in the chromosome of P. syringae pv. phaseolicola 1448A (accession no. CP000058). The file is in the format of a feature table (tab file) to be read as an entry with the Artemis browser. (TAB) [file pone.0025773.s005.tab]

FT repeat_region complement(8120..9631)
FT /rpt_family="IS91"
FT /db_xref="ISFinder:IS801"
FT /mobile_element="insertion sequence:IS801"
FT /primary_name="IS801"
FT /color=10
FT /note="IS801.T1"
FT /note="Complete element but with a premature stop codon in
FT the transposase gene"
FT repeat_region complement(9632..11143)
FT /rpt_family="IS91"
FT /db_xref="ISFinder:IS801"
FT /mobile_element="insertion sequence:IS801"
FT /note="IS801.1"
FT /primary_name="IS801"
FT gene complement(9812..11044)
FT /locus_tag="PSPPH_0007"
FT /note="PSPPH0007"
FT CDS complement(9812..11044)
FT /locus_tag="PSPPH_0007"
FT /note="identified by similarity to SP:P24607; match to
FT protein family HMM PF04986"
FT /codon_start=1
FT /transl_table=11
FT /product="IS801, transposase"
FT /protein_id="AAZ37126.1"
FT /db_xref="GI:71557915"
FT /translation="MKPAYPPLLLQMSPAYTPRPLKNLFTANQCWAHLLEEGGLRDIE
FT VESVTKMLACGTSILGVKHYTCGNHSCPHVKYLCNTCHCRACPSCGKKATDQWIAVQN
FT NRLPDCPWQHLVFTLPDTLWPLFFYNRWLLDALFRLAADNLIYAAKRRGLRVGIFGAL
FT HTYGRRLNWHPHVHLSVTAGGLDEQGVWKNLSFHKEALRRRWMWLVRDYLLGQPLSQL
FT TMPPPLAHILCESDWRRLILTAGGQHWHIHLSKKTKNGRKTVNYLGRYLKKPPISGSR
FT LAHYTNGATLSFTYLDHRTQTYQQETLSQADMLFRVVQHIPEKHFRMIRYFGFLANRV
FT CRQYLPKVYEALKMATPGPTPKLYFVQMAKAFLNVDPFRCVLCGARMVYTAAISGLTV
FT QGLNLNAQAIAQMRYVKP"
FT repeat_region complement(19553..21064)
FT /rpt_family="IS91"
FT /db_xref="ISFinder:IS801"
FT /mobile_element="insertion sequence:IS801"
FT /note="IS801.2"
FT /primary_name="IS801"
FT gene complement(19733..20965)
FT /locus_tag="PSPPH_0016"
FT /note="PSPPH0016"
FT CDS complement(19733..20965)
FT /locus_tag="PSPPH_0016"
FT /note="identified by similarity to SP:P24607; match to
FT protein family HMM PF04986"
FT /codon_start=1
FT /transl_table=11
FT /product="IS801, transposase"
FT /protein_id="AAZ34750.1"
FT /db_xref="GI:71555539"
FT /translation="MKPAYPPLLLQMSPAYTPRPLKNLFTANQCWAHLLEEGGLRDIE
FT VESVTKMLACGTSILGVKHYTCGNHSCPHVKYLCNTCHCRACPSCGKKATDQWIAVQN
FT NRLPDCPWQHLVFTLPDTLWPLFFYNRWLLDALFRLAADNLIYAAKRRGLRVGIFGAL
FT HTYGRRLNWHPHVHLSVTAGGLDEQGVWKNLSFHKEALRRRWMWLVRDYLLGQPLSQL
FT TMPPPLAHILCESDWRRLILTAGGQHWHIHLSKKTKNGRKTVNYLGRYLKKPPISGSR
FT LAHYTNGATLSFTYLDHRTQTYQQETLSQADMLFRVVQHIPEKHFRMIRYFGFLANRV
FT CRQYLPKVYEALKMATPGPTPKLYFVQMAKAFLNVDPFRCVLCGARMVYTAAISGLTV
FT QGLNLNAQAIAQMRYVKP"
FT repeat_region 47594..48967
FT /rpt_family="IS256"
FT /db_xref="ISFinder:ISPsy17"
FT /mobile_element="insertion sequence:ISPsy17"
FT /note="ISPsy17.1"
FT /primary_name="ISPsy17"
FT /synonym="ISPsy18"
FT gene 47647..48906
FT /locus_tag="PSPPH_0046"
FT /note="PSPPH0046"
FT CDS 47647..48906
FT /locus_tag="PSPPH_0046"
FT /note="identified by match to protein family HMM PF00872"
FT /codon_start=1
FT /transl_table=11
FT /protein_id="AAZ34994.1"
FT /db_xref="GI:71555783"
FT /translation="MPTKKKSANATARELPSIPQERIEQFVKGPMSAEAIQDASMAFK
FT KALIERALGAELGHHLGYPQGAERPKESTNQRNGKSSKTVLTDDGPLRLDIPRDRDGS
FT FAPILIPKHERRFTGFDDKIIAMYARGMTVREIRAFLSEQYGTDVSHDFISSVTDAVM
FT EEVGAWQQRPLEPMYPVIFFDALRVKIRDEGLVCNKAIYLALGVLPDGTRDILGIWIE
FT STEGAKFWMKVFNDLKTRGVEDVLIAVTDGLKGIPEALGAVFPATTLQTCIVHLIRNS
FT LDYAAWDKRRALAKALKPIYQAINADVAEQELNAFEAGPWGKQYPTVVAAWRRAWDRV
FT IPFFVFPAGIRKVVYTTNAIESINAQLRKIIKTRGHFPTDEAATKLIWLGLRNITANW
FT GHAAHDWKVAMNQFAILYGDRFTRPSW"
FT /product="ISPsy17, transposase"
FT repeat_region complement(50803..52176)
FT /rpt_family="IS256"
FT /db_xref="ISFinder:ISPsy17"
FT /mobile_element="insertion sequence:ISPsy17"
FT /note="ISPsy17.2"
FT /primary_name="ISPsy17"
FT /synonym="ISPsy18"
FT gene complement(50864..52123)
FT /locus_tag="PSPPH_0049"
FT /note="PSPPH0049"
FT CDS complement(50864..52123)
FT /locus_tag="PSPPH_0049"
FT /note="identified by match to protein family HMM PF00872"
FT /codon_start=1
FT /transl_table=11
FT /protein_id="AAZ33223.1"
FT /db_xref="GI:71554012"
FT /translation="MPTKKKSANATARELPSIPQELIEQFVKGPMSAEAIQDASMAFK
FT KALIERALGAELGHHLGYPQGAERPKESTNQRNGKSSKTVLTDDGPLRLDIPRDRDGS
FT FASILIPKHERRFTGFDDKIIAMYARGMTVREIRAFLSEQYGTDVSHDFISSVTDAVM
FT EEVGAWQQRPLEPMYPVIFFDALRVKIRDEGLVCNKAIYLALGVLPDGTRDILGIWIE
FT STEGAKFWMKVFNDLKTRGVEDVLIAVTDGLKGIPEALGAVFPATTLQTCIVHLIRNS
FT LDYAAWDKRRALAKALKPIYQAINADVAEQELNAFEAGPWGKQYPTVVAAWRRAWDRV
FT IPFFVFPAGIRKVVYMTNAIESINAQLRKIIKTRGHFPTDEAATKLIWLGLRNITANW
FT GHAAHDWKVAMNQFAILYGDRFTRPSW"
FT /product="ISPsy17, transposase"
FT repeat_region complement(130143..131320)
FT /rpt_family="IS5"
FT /db_xref="ISFinder:ISPsy19"
FT /mobile_element="insertion sequence:ISPsy19"
FT /primary_name="ISPsy19"
FT /note="ISPsy19.1"
FT gene complement(130159..131262)
FT /locus_tag="PSPPH_0113"
FT /note="PSPPH0113"
FT CDS complement(130159..131262)
FT /locus_tag="PSPPH_0113"
FT /note="identified by match to protein family HMM PF01609"
FT /codon_start=1
FT /transl_table=11
FT /product="ISPsy19, transposase"
FT /protein_id="AAZ36225.1"
FT /db_xref="GI:71557014"
FT /translation="MPKTGRPRSIAAEHYPVLVKLAHAQPYSSQAELALVFFAETGIT
FT AHPDTFAKALKMAGITRVKQRAKGSFQSPEPNKAYGYNETHRRQLPEQLYPSCLTDTE
FT WALVADLFESQGGRGVPPLHSRRTLLEACCYVVRTGCSWRMLPRDFPHWDNVYKTFRR
FT WSAQGKFEQMHDRLRAQWREREERADSPSAAILDSQSTRSSPQGGDSGYDAGKKVKGR
FT KRSLIVDTLGLLLAVSISAASVQDRDAADDAVAYSKEKYPSLSTLFVDSAYAGKWAQR
FT THQLHAIDVQVIRGPNNRRTGQWHSEQGDLFSVEPVQTGFVVMPKRWVVERTHAWNER
FT ARRLIMHHDRLFAVSEAWVWLAEARILARRLTT"
FT repeat_region 131324..132517
FT /rpt_family="IS5"
FT /db_xref="ISFinder:ISPsy2"
FT /mobile_element="insertion sequence:ISPsy2"
FT /note="ISPsy2.1"
FT /primary_name="ISPsy2"
FT gene 131400..132371
FT /locus_tag="PSPPH_0114"
FT /note="PSPPH0114"
FT CDS 131400..132371
FT /locus_tag="PSPPH_0114"
FT /note="identified by similarity to GB:BAB60892.1; match to
FT protein family HMM PF01609"
FT /codon_start=1
FT /transl_table=11
FT /product="ISPsy2, transposase"
FT /protein_id="AAZ35839.1"
FT /db_xref="GI:71556628"
FT /translation="MTFADAEYAGKRKQTRKELFLIEMDQVVPWKGLIALIEPYYPKG
FT EGGRPAYPLMAMLRVHLMQNWFGYSDPAMEEALYETTILRQFSGLSLERIPDETTILN
FT FRRLLEKHELATGILGVINGYLGDRGLSLRQGTIVDATLIHAPSSTKNKDGKRDPEMH
FT QTKKGNQYYFGAKAHIGADDESGLVHSVVVTAANVADVTQVAKLLHGEENVVCADAGY
FT TGVEKREEHAGRKVIWQIAARHSTYKKHGKRSILYKAIRKIEKAKAQVRAKVEHPFGV
FT IKRQFGYEKVRFRGLAKNTAQMVTLFALSNLWMAGRHLLASAGEVRV"
FT repeat_region complement(136653..138026)
FT /rpt_family="IS256"
FT /db_xref="ISFinder:ISPsy17"
FT /mobile_element="insertion sequence:ISPsy17"
FT /note="ISPsy17.3"
FT /primary_name="ISPsy17"
FT /synonym="ISPsy18"
FT gene complement(136714..137973)
FT /locus_tag="PSPPH_0119"
FT /note="PSPPH0119"
FT CDS complement(136714..137973)
FT /locus_tag="PSPPH_0119"
FT /note="identified by match to protein family HMM PF00872"
FT /codon_start=1
FT /transl_table=11
FT /protein_id="AAZ37080.1"
FT /db_xref="GI:71557869"
FT /translation="MPTKKKSANATARELPSIPQELIEQFVKGPMSAEAIQDASMAFK
FT KALIERALGAELGHHLGYPQGAERPEESTNQRNGKSSKTVLTDDGPLRLDIPRDRDGS
FT FAPILIPKHERRFTGFDDKIIAMYARGMTVREIRAFLSEQYGTDVSHDFISSVTDAVM
FT EEVGAWQQRPLEPMYPVIFFYALRVKIRDEGLVCNKAIYLALGVLPDGTRDILGIWIE
FT STEGAKFWMKVFNDLKTRGVEDVLIAVTDGLKGIPEALGAVFPATTLQTCIVHLIRNS
FT LDYAAWDKRRALAKALKPIYQAINADVAEQELNAFEAGPWGKQYPTVVAAWRRAWDRV
FT IPFFVFPAGIRKVVYMTNAIESINAQLRKIIKTRGHFPTDEAATKLIWLGLRNITANW
FT GHAAHDWKVAMNQFAILYGDRFTRPSW"
FT /product="ISPsy17, transposase"
FT repeat_region 186714..187143
FT /rpt_family="IS256"
FT /db_xref="ISFinder:ISPsy17"
FT /mobile_element="insertion sequence:ISPsy17"
FT /color=10
FT /note="ISPsy17.T1"
FT /primary_name="ISPsy17"
FT /synonym="ISPsy18"
FT repeat_region complement(187144..188690)
FT /note="IS53.T1"
FT /note="lacks the first 1023 nt (over 2570 nt wt size)"
FT /color=10
FT /rpt_family="IS21"
FT /mobile_element="insertion sequence:IS53"
FT /db_xref="ISFinder:IS53"
FT /primary_name="IS53"
FT /synonym="ISPsy20"
FT repeat_region complement(195295..196488)
FT /rpt_family="IS5"
FT /db_xref="ISFinder:ISPsy2"
FT /mobile_element="insertion sequence:ISPsy2"
FT /note="ISPsy2.2"
FT /primary_name="ISPsy2"
FT gene complement(195441..196412)
FT /locus_tag="PSPPH_0169"
FT /note="PSPPH0169"
FT CDS complement(195441..196412)
FT /locus_tag="PSPPH_0169"
FT /note="identified by match to protein family HMM PF01609"
FT /codon_start=1
FT /transl_table=11
FT /product="ISPsy2, transposase"
FT /protein_id="AAZ37481.1"
FT /db_xref="GI:71558270"
FT /translation="MTFADAEYAGKRKQTRKELFLIEMDQVVPWKGLIALIEPYYPKG
FT EGGRPAYPLMAMLRVHLMQNWFGYSDPAMEEALYETTILRQFSGLSLERIPDETTILN
FT FRRLLEKHELATGILGVINGYLGDRGLSLRQGTIVDATLIHAPSSTKNKDGKRDPEMH
FT QTKKGNQYYFGAKAHIGADDESGLVHSVVVTAANVADVTQVAKLLHGEENVVCADAGY
FT TGVEKREEHAGRKVIWQIAARHSTYKKHGKRSILYKAIRKIEKAKAQVRAKVEHPFGV
FT IKRQFGYEKVRFRGLAKNTAQMVTLFALSNLWMAGRHLLASAGEVRV"
FT repeat_region 196492..197669
FT /rpt_family="IS5"
FT /db_xref="ISFinder:ISPsy19"
FT /mobile_element="insertion sequence:ISPsy19"
FT /primary_name="ISPsy19"
FT /note="ISPsy19.2"
FT gene 196550..197653
FT /locus_tag="PSPPH_0170"
FT /note="PSPPH0170"
FT CDS 196550..197653
FT /locus_tag="PSPPH_0170"
FT /note="identified by match to protein family HMM PF01609"
FT /codon_start=1
FT /transl_table=11
FT /product="ISPsy19, transposase"
FT /protein_id="AAZ37742.1"
FT /db_xref="GI:71558531"
FT /translation="MPKTGRPRSIAAEHYPVLVKLAHAQPYSSQAELALVFFAETGIT
FT AHPDTFAKALKMAGITRVKQRAKGSFQSPEPNKAYGYNETHRRQLPEQLYPSCLTDTE
FT WALVADLFESQGGRGVPPLHSRRTLLEACCYVVRTGCSWRMLPRDFPHWDNVYKTFRR
FT WSAQGKFEQMHDRLRAQWREREERADSPSAAILDSQSTRSSPQGGDSGYDAGKKVKGR
FT KRSLIVDTLGLLLAVSISAASVQDRDAADDAVAYSKEKYPSLSTLFVDSAYAGKWAQR
FT THQLHAIDVQVIRGPNNRRTGQWHSEQGDLFSVEPVQTGFVVMPKRWVVERTHAWNER
FT ARRLIMHHDRLFAVSEAWVWLAEARILARRLTT"
FT repeat_region 209022..209540
FT /rpt_family="IS5"
FT /db_xref="ISFinder:ISPsy2"
FT /mobile_element="insertion sequence:ISPsy2"
FT /note="ISPsy2.T1"
FT /primary_name="ISPsy2"
FT /color=10
FT repeat_region 209544..210721
FT /rpt_family="IS5"
FT /db_xref="ISFinder:ISPsy19"
FT /mobile_element="insertion sequence:ISPsy19"
FT /primary_name="ISPsy19"
FT /note="ISPsy19.3"
FT gene 209602..210705
FT /locus_tag="PSPPH_0176"
FT /note="PSPPH0176"
FT CDS 209602..210705
FT /locus_tag="PSPPH_0176"
FT /note="identified by match to protein family HMM PF01609"
FT /codon_start=1
FT /transl_table=11
FT /product="ISPsy19, transposase"
FT /protein_id="AAZ37374.1"
FT /db_xref="GI:71558163"
FT /translation="MPKTGRPRSIAAEHYPVLVKLAHAQPYSSQAELALVFFAETGIT
FT AHPDTFAKALKMAGITRVKQRAKGSFQSPEPNKAYGYNETHRRQLPEQLYPSCLTDTE
FT WALVADLFESQGGRGVPPLHSRRTLLEACCYVVRTGCSWRMLPRDFPHWDNVYKTFRR
FT WSAQGKFEQMHDRLRAQWREREERADSPSAAILDSQSTRSSPQGGDSGYDAGKKVKGR
FT KRSLIVDTLGLLLAVSISAASVQDRDAADDAVAYSKEKYPSLSTLFVDSAYAGKWAQR
FT THQLHAIDVQVIRGPNNRRTGQWHSEQGDLFSVEPVQTGFVVMPKRWVVERTHAWNER
FT ARRLIMHHDRLFAVSEAWVWLAEARILARRLTT"
FT gene complement(220514..221149)
FT /locus_tag="PSPPH_0182"
FT /note="PSPPH0182"
FT CDS complement(220514..221149)
FT /locus_tag="PSPPH_0182"
FT /note="identified by similarity to GB:AAO53612.1"
FT /codon_start=1
FT /transl_table=11
FT /product="transposition helper protein, truncated"
FT /protein_id="AAZ36461.1"
FT /db_xref="GI:71557250"
FT /translation="MTDYSHLHVDFKPVLMLSDKERIRFMGEPRWIGYQAAHNILDTL
FT ESLLDAPKRPRMPNLLIVGDSNNGKTTIVRHFVKNHGEGYIDEHSEAVRPVILAQAPP
FT SADEKDLYAAILETFWMPYRRTDSKLVLRYQVIHTMRELKVRMLIIDEIHSMLTGAVA
FT KQREVMNALKMLCNELAIPIVGVGTPDAVQVLHHTVTVKHEALCSTEVSHE"
FT gene complement(221146..222151)
FT /locus_tag="PSPPH_0183"
FT /note="PSPPH0183; transposase, degenerate; this region
FT contains one or more premature stops and/or frameshifts
FT which are not the result of sequencing error"
FT /pseudo
FT repeat_region 386874..388247
FT /rpt_family="IS256"
FT /db_xref="ISFinder:ISPsy17"
FT /mobile_element="insertion sequence:ISPsy17"
FT /note="ISPsy17.4"
FT /primary_name="ISPsy17"
FT /synonym="ISPsy18"
FT gene 386927..388186
FT /locus_tag="PSPPH_0339"
FT /note="PSPPH0339"
FT CDS 386927..388186
FT /locus_tag="PSPPH_0339"
FT /note="identified by match to protein family HMM PF00872"
FT /codon_start=1
FT /transl_table=11
FT /protein_id="AAZ34507.1"
FT /db_xref="GI:71555296"
FT /translation="MPTKKKSANATARELPSIPQELIEQFVKGPMSAEAIQDASMAFK
FT KALIERALGAELGHHLGYPQGAERPEESTNQRNGKSSKTVLTDDGPLRLDIPRDRDGS
FT FAPILIPKHERRFTGFDDKIIAMYARGMTVREIRAFLSEQYGTDVSHDFISSVTDAVM
FT EEVGAWQQRPLEPMYPVIFFDALRVKIRDEGLVCNKAIYLALGVLPDGTRDILGIWIE
FT STEGAKFWMKVFNDLKTRGVEDVLIAVTDGLKGIPEALGAVFPATTLQTCIVHLIRNS
FT LDYAAWDKRRALAKALKPIYQAINADVAEQELNAFEAGPWGKQYPTVVAAWRRAWDRV
FT IPFFVFPAGIRKVVYTTNAIESINAQLRKIIKTRGHFPTDEAATKLIWLGLRNITANW
FT GHAAHDWKVAMNQFAILYGDRFTRPSW"
FT /product="ISPsy17, transposase"
FT repeat_region complement(705671..705770)
FT /rpt_family="ISNCY"
FT /mobile_element="Miniature inverted-repeats transposable
FT element:MITEPsy1"
FT /note="MITEPsy1.1"
FT repeat_region 715970..717147
FT /rpt_family="IS5"
FT /db_xref="ISFinder:ISPsy19"
FT /mobile_element="insertion sequence:ISPsy19"
FT /primary_name="ISPsy19"
FT /note="ISPsy19.4"
FT gene 716028..717131
FT /locus_tag="PSPPH_0606"
FT /note="PSPPH0606"
FT CDS 716028..717131
FT /locus_tag="PSPPH_0606"
FT /note="identified by match to protein family HMM PF01609"
FT /codon_start=1
FT /transl_table=11
FT /product="ISPsy19, transposase"
FT /protein_id="AAZ33974.1"
FT /db_xref="GI:71554763"
FT /translation="MPKTGRPRSIAAEHYPVLVKLAHAQPYSSQAELALVFFAETGIT
FT AHPDTFAKALKMAGITRVKQRAKGSFQSPEPNKAYGYNETHRRQLPEQLYPSCLTDTE
FT WALVADLFESQGGRGVPPLHSRRTLLEACCYVVRTGCSWRMLPRDFPHWDNVYKTFRR
FT WSAQGKFEQMHDRLRAQWREREERADSPSAAILDSQSTRSSPQGGDSGYDAGKKVKGR
FT KRSLIVDTLGLLLAVSISAASVQDRDAADDAVAYSKEKYPSLSTLFVDSAYAGKWAQR
FT THQLHAIDVQVIRGPNNRRTGQWHSEQGDLFSVEPVQTGFVVMPKRWVVERTHAWNER
FT ARRLIMHHDRLFAVSEAWVWLAEARILARRLTT"
FT repeat_region 730748..732121
FT /rpt_family="IS256"
FT /db_xref="ISFinder:ISPsy17"
FT /mobile_element="insertion sequence:ISPsy17"
FT /note="ISPsy17.5"
FT /primary_name="ISPsy17"
FT /synonym="ISPsy18"
FT gene 730801..732060
FT /locus_tag="PSPPH_0617"
FT /note="PSPPH0617"
FT CDS 730801..732060
FT /locus_tag="PSPPH_0617"
FT /note="identified by match to protein family HMM PF00872"
FT /codon_start=1
FT /transl_table=11
FT /product="ISPsy17, transposase"
FT /protein_id="AAZ36332.1"
FT /db_xref="GI:71557121"
FT /translation="MPTKKKSANATARELPSIPQELIEQFVKGPMSAEAIQDASMAFK
FT KALIERALGAELGHHLGYPQGAERPKESTNQRNGKSSKTVLTDDGPLRLDIPRDRDGS
FT FASILIPKHERRFTGFDDKIIAMYARGMTVREIRAFLSEQYGTDVSHDFISSVTDAVM
FT EEVGAWQQRPLEPMYPVIFFDALRVKIRDEGLVCNKAIYLALGVLPDGTRDILGIWIE
FT STEGAKFWMKVFNDLKTRGVEDVLIAVTDGLKGIPEALGAVFPATTLQTCIVHLIRNS
FT LDYAAWDKRRALAKALKPIYQAINADVAEQELNAFEAGPWGKQYPTVVAAWRRAWDRV
FT IPFFVFPAGIRKVVYTTNAIESINAQLRKIIKTRGHFPTDEAATKLIWLGLRNITANW
FT GHAAHDWKVAMNQFAILYGDRFTRPSW"
FT repeat_region complement(821637..823010)
FT /rpt_family="IS256"
FT /db_xref="ISFinder:ISPsy17"
FT /mobile_element="insertion sequence:ISPsy17"
FT /note="ISPsy17.6"
FT /primary_name="ISPsy17"
FT /synonym="ISPsy18"
FT gene complement(821698..822957)
FT /locus_tag="PSPPH_0699"
FT /note="PSPPH0699"
FT CDS complement(821698..822957)
FT /locus_tag="PSPPH_0699"
FT /note="identified by match to protein family HMM PF00872"
FT /codon_start=1
FT /transl_table=11
FT /protein_id="AAZ36164.1"
FT /db_xref="GI:71556953"
FT /translation="MPTKKKSANATARELPSIPQELIEQFVKGPMSAEAIQDASMAFK
FT KALIERALGAELGHHLGYPQGAERPKESTNQRNGKSSKTVLTDDGPLRLDIPRDRDGS
FT FAPILIPKHERRFTGFDDKIIAMYARGMTVREIRAFLSEQYGTDVSHDFISSVTDAVM
FT EEVGAWQQRPLEPMYPVIFFDALRVKIRDEGLVCNKAIYLALGVLPDGTRDILGIWIE
FT STEGAKFWMKVFNDLKTRGVEDVLIAVTDGLKGIPEALGAVFPATTLQTCIVHLIRNS
FT LDYAAWDKRRALAKALKPIYQAINADVAEQELNAFEAGPWGKQYPTVVAAWRRAWDRV
FT IPFFVFPAGIRKVVYTTNAIESINAQLRKIIKTRGHFPTDEAATKLIWLGLRNITANW
FT GHAAHDWKVAMNQFAILYGDRFTRPSW"
FT /product="ISPsy17, transposase"
FT repeat_region complement(824151..825637)
FT /note="IS53.T2"
FT /note="Lacks 1085 nt in 3' (2570 nt wt size; the deletion
FT fuse the TGnase ORF in phase with a putative
FT transcriptional regulator, LysR family"
FT /color=10
FT /rpt_family="IS21"
FT /mobile_element="insertion sequence:IS53"
FT /db_xref="ISFinder:IS53"
FT /primary_name="IS53"
FT /synonym="ISPsy20"
FT repeat_region complement(872850..873185)
FT /rpt_family="IS256"
FT /db_xref="ISFinder:ISPsy17"
FT /mobile_element="insertion sequence:ISPsy17"
FT /color=10
FT /note="ISPsy17.T2"
FT /primary_name="ISPsy17"
FT /synonym="ISPsy18"
FT repeat_region complement(900524..901701)
FT /rpt_family="IS5"
FT /db_xref="ISFinder:ISPsy19"
FT /mobile_element="insertion sequence:ISPsy19"
FT /primary_name="ISPsy19"
FT /note="ISPsy19.5"
FT gene complement(900540..901643)
FT /locus_tag="PSPPH_0769"
FT /note="PSPPH0769"
FT CDS complement(900540..901643)
FT /locus_tag="PSPPH_0769"
FT /note="identified by match to protein family HMM PF01609"
FT /codon_start=1
FT /transl_table=11
FT /product="ISPsy19, transposase"
FT /protein_id="AAZ33774.1"
FT /db_xref="GI:71554563"
FT /translation="MPKTGRPRSIAAEHYPVLVKLAHAQPYSSQAELALVFFAETGIT
FT AHPDTFAKALKMAGITRVKQRAKGSFQSPEPNKAYGYNETHRRQLPEQLYPSCLTDTE
FT WALVADLFESQGGRGVPPLHSRRTLLEACCYVVRTGCSWRMLPRDFPHWDNVYKTFRR
FT WSAQGKFEQMHDRLRAQWREREERADSPSAAILDSQSTRSSPQGGDSGYDAGKKVKGR
FT KRSLIVDTLGLLLAVSISAASVQDRDAADDAVAYSKEKYPSLSTLFVDSAYAGKWAQR
FT THQLHAIDVQVIRGPNNRRTGQWHSEQGDLFSVEPVQTGFVVMPKRWVVERTHAWNER
FT ARRLIMHHDRLLAVSEAWVWLAEARILARRLTT"
FT repeat_region 901705..901804
FT /rpt_family="ISNCY"
FT /mobile_element="Miniature inverted-repeats transposable
FT element:MITEPsy1"
FT /note="MITEPsy1.2"
FT repeat_region 911019..912196
FT /rpt_family="IS5"
FT /db_xref="ISFinder:ISPsy19"
FT /mobile_element="insertion sequence:ISPsy19"
FT /primary_name="ISPsy19"
FT /note="ISPsy19.6"
FT gene 911077..912180
FT /locus_tag="PSPPH_0776"
FT /note="PSPPH0776"
FT CDS 911077..912180
FT /locus_tag="PSPPH_0776"
FT /note="identified by match to protein family HMM PF01609"
FT /codon_start=1
FT /transl_table=11
FT /product="ISPsy19, transposase"
FT /protein_id="AAZ36339.1"
FT /db_xref="GI:71557128"
FT /translation="MPKTGRPRSIAAEHYPVLVKLAHAQPYSSQAELALVFFAETGIT
FT AHPDTFAKALKMAGITRVKQRAKGSFQSPEPNKAYGYNETHRRQLPEQLYPSCLTDTE
FT WALVADLFESQGGRGVPPLHSRRTLLEACCYVVRTGCSWRMLPRDFPHWDNVYKTFRR
FT WSAQGKFEQMHDRLRAQWREREERADSPSAAILDSQSTRSSPQGGDSGYDAGKKVKGR
FT KRSLIVDTLGLLLAVSISAASVQDRDAADDAVAYSKEKYPSLSTLFVDSAYAGKWAQR
FT THQLHAIDVQVIRGPNNRRTGQWHSEQGDLFSVEPVQTGFVVMPKRWVVERTHAWNER
FT ARRLIMHHDRLFAVSEAWVWLAEARILARRLTT"
FT repeat_region complement(926491..926718)
FT /note="MITEPsy2.1"
FT /rpt_family="ISNCY"
FT /mobile_element="Miniature inverted-repeats transposable
FT element:MITEPsy2"
FT repeat_region complement(928582..929100)
FT /rpt_family="IS5"
FT /db_xref="ISFinder:ISPsy2"
FT /mobile_element="insertion sequence:ISPsy2"
FT /note="ISPsy2.T2"
FT /primary_name="ISPsy2"
FT /color=10
FT repeat_region 929097..929968
FT /rpt_family="IS5"
FT /db_xref="ISFinder:ISPsy19"
FT /mobile_element="insertion sequence:ISPsy19"
FT /color=10
FT /primary_name="ISPsy19"
FT /note="ISPsy19.T1"
FT repeat_region 930011..931322
FT /note="IS51.1"
FT /rpt_family="IS3"
FT /mobile_element="insertion sequence:IS51"
FT /db_xref="ISFinder:IS51"
FT /primary_name="IS51"
FT /synonym="ISPsy21"
FT gene 930061..930384
FT /locus_tag="PSPPH_0787"
FT /note="PSPPH0787"
FT CDS 930061..930384
FT /locus_tag="PSPPH_0787"
FT /note="identified by similarity to GB:AAA88437.1; match to
FT protein family HMM PF01527"
FT /codon_start=1
FT /transl_table=11
FT /product="IS51, transposase orfA"
FT /protein_id="AAZ36323.1"
FT /db_xref="GI:71557112"
FT /translation="MKKLPKYSPEVRERAIRMVFEHLPEYESQWATISAIAPKIGCTP
FT ETLRLWVRQSERNTGQRDGLSTVERERVKLLERENRQLRQANEILRKASAYFAQAELD
FT RPFKR"
FT gene 930381..931283
FT /locus_tag="PSPPH_0788"
FT /note="PSPPH0788"
FT CDS 930381..931283
FT /locus_tag="PSPPH_0788"
FT /note="identified by similarity to GB:CAD42759.1; match to
FT protein family HMM PF00665"
FT /codon_start=1
FT /transl_table=11
FT /product="IS51, transposase orfB"
FT /protein_id="AAZ35626.1"
FT /db_xref="GI:71556415"
FT /translation="MKTFIDENRQSYGVEPICKVLPIAPSTYYRYAAQQADPSQQSAR
FT AQRDQELGEHIQRVWDKHFHVYGMRKVWRQLLREGQQVARCTVQRLMGELGLQGVVRG
FT KPVKTTVSDQARPCPQDHVNRQFVAECPNALWVSDFTYVSTWQGFVYVAFIVDVFARF
FT IVGWKVSSSARTDFALDALEQALYARRPVKQGGLIHHSDRGVQYVSIRYTERLVEAGI
FT EPSVGSVGDSYDNALAETINGLYKAEVIHRRSWPTRGAVELETLKWVDWFNHRRLLEP
FT IGHIPPVEAEAIYYQQLTESAQVA"
FT repeat_region 983526..984899
FT /rpt_family="IS256"
FT /db_xref="ISFinder:ISPsy17"
FT /mobile_element="insertion sequence:ISPsy17"
FT /note="ISPsy17.7"
FT /primary_name="ISPsy17"
FT /synonym="ISPsy18"
FT gene 983579..984838
FT /locus_tag="PSPPH_0822"
FT /note="PSPPH0822"
FT CDS 983579..984838
FT /locus_tag="PSPPH_0822"
FT /note="identified by match to protein family HMM PF00872"
FT /codon_start=1
FT /transl_table=11
FT /protein_id="AAZ33415.1"
FT /db_xref="GI:71554204"
FT /translation="MPTKKKSANATARELPSIPQELIEQFVKGPMSAEAIQDASMAFK
FT KALIERALGAELGHHLGYPQGAERPEGATNQRNGKSSKTVLTDDGPLRLDIPRDRDGS
FT FAPILIPKHERRFTGFDDKIIAMYARGMTVREIRAFLSEQYGTDVSHDFISSVTDAVM
FT EEVGAWQQRPLEPMYPVIFFDALRVKIRDEGLVCNKAIYLALGVLPDGTRDILGIWIE
FT STEGAKFWMKVFNDLKTRGVEDVLIAVTDGLKGIPEALGAVFPATTLQTCIVHLIRNS
FT LDYAAWDKRRALAKALKPIYQAINADVAEQELNAFEAGPWGKQYPTVVAAWRRAWDRV
FT IPFFVFPAGIRKVVYTTNAIESINAQLRKIIKTRGHFPTDEAATKLIWLGLRNITANW
FT GHAAHDWKVAMNQFAILYGDRFTRPSW"
FT /product="ISPsy17, transposase"
FT repeat_region complement(join(987422..988225,988226..988521))
FT /note="ISPsy17.T3"
FT /note="Internal deletion of 205 nt"
FT /rpt_family="IS256"
FT /db_xref="ISFinder:ISPsy17"
FT /mobile_element="insertion sequence:ISPsy17"
FT /color=10
FT /primary_name="ISPsy17"
FT /synonym="ISPsy18"
FT repeat_region complement(1065530..1067041)
FT /rpt_family="IS91"
FT /db_xref="ISFinder:IS801"
FT /mobile_element="insertion sequence:IS801"
FT /primary_name="IS801"
FT /color=10
FT /note="IS801.T2"
FT /note="Complete element but with a premature stop codon in
FT the transposase gene"
FT repeat_region 1069914..1071091
FT /rpt_family="IS5"
FT /db_xref="ISFinder:ISPsy19"
FT /mobile_element="insertion sequence:ISPsy19"
FT /primary_name="ISPsy19"
FT /note="ISPsy19.7"
FT gene 1069972..1071075
FT /locus_tag="PSPPH_0899"
FT /note="PSPPH0899"
FT CDS 1069972..1071075
FT /locus_tag="PSPPH_0899"
FT /note="identified by match to protein family HMM PF01609"
FT /codon_start=1
FT /transl_table=11
FT /product="ISPsy19, transposase"
FT /protein_id="AAZ36076.1"
FT /db_xref="GI:71556865"
FT /translation="MPKTGRPRSIAAEHYPVLVKLAHAQPYSSQAELALVFFAETGIT
FT AHPDTFAKALKMAGITRVKQRAKGSFQSPEPNKAYGYNETHRRQLPEQLYPSCLTDTE
FT WALVADLFESQGGRGVPPLHSRRTLLEACCYVVRTGCSWRMLPRDFPHWDNVYKTFRR
FT WSAQGKFEQMHDRLRAQWREREERADSPSAAILDSQSTRSSPQGGDSGYDAGKKVKGR
FT KRSLIVDTLGLLLAVSISAASVQDRDAADDAVAYSKEKYPSLSTLFVDSAYAGKWAQR
FT THQLHAIDVQVIRGPNNRRTGQWHSEQGDLFSVEPVQTGFVVMPKRWVVERTHAWNER
FT ARRLIMHHDRLFAVSEAWVWLAEARILARRLTT"
FT repeat_region 1091699..1092876
FT /rpt_family="IS5"
FT /db_xref="ISFinder:ISPsy19"
FT /mobile_element="insertion sequence:ISPsy19"
FT /primary_name="ISPsy19"
FT /note="ISPsy19.8"
FT gene 1091757..1092860
FT /locus_tag="PSPPH_0917"
FT /note="PSPPH0917"
FT CDS 1091757..1092860
FT /locus_tag="PSPPH_0917"
FT /note="identified by match to protein family HMM PF01609"
FT /codon_start=1
FT /transl_table=11
FT /product="ISPsy19, transposase"
FT /protein_id="AAZ35411.1"
FT /db_xref="GI:71556200"
FT /translation="MPKTGRPRSIAAEHYPVLVKLAHAQPYSSQAELALVFFAETGIT
FT AHPDTFAKALKMAGITRVKQRAKGSFQSPEPNKAYGYNETHRRQLPEQLYPSCLTDTE
FT WALVADLFESQGGRGVPPLHSRRTLLEACCYVVRTGCSWRMLPRDFPHWDNVYKTFRR
FT WSAQGKFEQMHDRLRAQWREREERADSPSAAILDSQSTRSSPQGGDSGYDAEKKVKGR
FT KRSLIVDTLGLLLAVSISAASVQDRDAADDAVAYSKEKYPSLSTLFVDSAYAGKWAQR
FT THQLHAIDVQVIRGPNNRRTGQWHSEQGDLFSVEPVQTGFVVMPKRWVVERTHAWNER
FT ARRLIMHHDRLFAVSEAWVWLAEARILARRLTT"
FT repeat_region complement(1103412..1104923)
FT /rpt_family="IS91"
FT /db_xref="ISFinder:IS801"
FT /mobile_element="insertion sequence:IS801"
FT /primary_name="IS801"
FT /color=10
FT /note="IS801.T3"
FT /note="Complete element but with a premature stop codon in
FT the transposase gene"
FT repeat_region 1123555..1124090
FT /note="ISPsy22.T1"
FT /rpt_family="IS5"
FT /db_xref="ISFinder:ISPsy22"
FT /mobile_element="insertion sequence:ISPsy22"
FT /primary_name="ISPsy22"
FT /color=10
FT repeat_region join(1149219..1149486,1149483..1149771)
FT /note="ISPsy4.T1"
FT /note="Contains an internal deletion of 1406 nt and lacks
FT 97 nt in the 3' end"
FT /rpt_family="IS21"
FT /db_xref="ISFinder:ISPsy4"
FT /mobile_element="insertion sequence:ISPsy4"
FT /primary_name="ISPsy4"
FT /color=10
FT /synonym="ISPsy23"
FT repeat_region 1179709..1182280
FT /note="IS53.1"
FT /rpt_family="IS21"
FT /mobile_element="insertion sequence:IS53"
FT /db_xref="ISFinder:IS53"
FT /primary_name="IS53"
FT /synonym="ISPsy20"
FT gene 1179824..1181323
FT /locus_tag="PSPPH_0986"
FT /note="PSPPH0986"
FT CDS 1179824..1181323
FT /locus_tag="PSPPH_0986"
FT /note="identified by similarity to GB:AAN85144.1; match to
FT protein family HMM PF00665"
FT /codon_start=1
FT /transl_table=11
FT /product="IS53, transposase IstA"
FT /protein_id="AAZ36814.1"
FT /db_xref="GI:71557603"
FT /translation="MGKIRRMYFRDKLSLHQIAKRTGLSRNTIRKWVRAPEANQPAYQ
FT RCASFNKLNPFHETLEQALKADSFRPKHNRRSAKALFEQIKAEGYDGGYSQLTAFVRS
FT WRCEQGKSVRAFVPLTFALGEAFQFDWSEEGLLIGGLFRRIQVSHMKLCASRAFWLVA
FT YPSQGHEMLFDAHTRSFGALGGVPRRGIYDNMKTAVDKVNKGKGRTVNARFSVMCAHY
FT LFDPDFCNVASGWEKGIVEKNVQDSRRRIWLDAQNCMFHTFEELNVWLGQRCRTLWAE
FT LVHPQYNGLTVAEVLELEQAEMMPMPTAFDGYVERTVRVSSTCLISVARNRYSVPCER
FT VGQWVSSRLYPSRIVVIADETVIASHERLFDRDQVGFDWQHYIPLIERKPGALRNGAP
FT FADLPKPLQLLKRGLRRHTNGDRIMMQVLAAVPIAGLEPVLVAVELVLESGSLSADHI
FT LNVVARLTSTAPPPCVETSLQLKVAPVANTARYDRLRTTDEENRNA"
FT gene 1181316..1182119
FT /locus_tag="PSPPH_0987"
FT /note="PSPPH0987"
FT CDS 1181316..1182119
FT /locus_tag="PSPPH_0987"
FT /note="identified by similarity to GB:BAC55320.2; match to
FT protein family HMM PF01695"
FT /codon_start=1
FT /transl_table=11
FT /product="IS53, transposase IstB"
FT /protein_id="AAZ34080.1"
FT /db_xref="GI:71554869"
FT /translation="MRDLMTELKELRLHGMASAWEELVSQGTASTASSKWLLEHLLQQ
FT EHADRAVRSVNHQMNMAKLPMHRDLAGFDFSASSADARLVSDLSSLAFTETAQNVVFI
FT GGPGTGKTHLASALAVSGITAYNKRVRFFSTVDLVNLLEREKYDGKAGRIAQALLRTD
FT LVILNELGYLPFSQSGGALLFHLLSKLYEHTSVVITTNLSFSEWSSVFGDAKMTTALL
FT DRLTHHCHIVETGNESYRLQHSTLAAQTKIKTRERKRKDGNDIEDDEPF"
FT repeat_region 1256525..1257898
FT /rpt_family="IS256"
FT /db_xref="ISFinder:ISPsy17"
FT /mobile_element="insertion sequence:ISPsy17"
FT /note="ISPsy17.8"
FT /primary_name="ISPsy17"
FT /synonym="ISPsy18"
FT gene 1256578..1257837
FT /locus_tag="PSPPH_1064"
FT /note="PSPPH1064"
FT CDS 1256578..1257837
FT /locus_tag="PSPPH_1064"
FT /note="identified by match to protein family HMM PF00872"
FT /codon_start=1
FT /transl_table=11
FT /protein_id="AAZ37727.1"
FT /db_xref="GI:71558516"
FT /translation="MPTKKKSANATARELPSIPQELIEQFVKGPMSAEAIQDASMAFK
FT KALIERALGAELGHHLGYPQGAERPEESTNQRNGKSSKTVLTDDGPLRLDIPRDRDGS
FT FAPILIPKHERRFTGFDDKIIAMYARGMTVREIRAFLSEQYGTDVSHDFISSVTDAVM
FT EEVGAWQQRPLEPMYPVIFFDALRVKIRDEGLVCNKAIYLALGVLPDGTRDILGIWIE
FT STEGAKFWMKVFNDLKTRGVEDVLIAVTDGLKGIPEALGAVFPATTLQTCIVHLIRNS
FT LDYAAWDKRRALAKALKPIYQAINADVVEQELNAFEAGPWGKQYPTVVAAWRRAWDRV
FT IPFFVFPAGIRKVVYTTNAIESINAQLRKIIKTRGHFPTDEAATKLIWLGLRNITANW
FT GHAAHDWKVAMNQFAILYGDRFTRPSW"
FT /product="ISPsy17, transposase"
FT repeat_region 1338164..1340735
FT /note="IS53.2"
FT /rpt_family="IS21"
FT /mobile_element="insertion sequence:IS53"
FT /db_xref="ISFinder:IS53"
FT /primary_name="IS53"
FT /synonym="ISPsy20"
FT gene 1338279..1339778
FT /locus_tag="PSPPH_1140"
FT /note="PSPPH1140"
FT CDS 1338279..1339778
FT /locus_tag="PSPPH_1140"
FT /note="identified by similarity to GB:AAN85144.1; match to
FT protein family HMM PF00665"
FT /codon_start=1
FT /transl_table=11
FT /product="IS53, transposase IstA"
FT /protein_id="AAZ37669.1"
FT /db_xref="GI:71558458"
FT /translation="MGKIRRMYFRDKLSLHQIAKRTGLSRNTIRKWVRAPEANQPAYQ
FT RCASFNKLNPFHETLEQALKADSFRPKHNRRSAKALFEQIKAEGYDGGYSQLTAFVRS
FT WRCEQGKSVRAFVPLTFALGEAFQFDWSEEGLLIGGLFRRIQVSHMKLCASRAFWLVA
FT YPSQGHEMLFDAHTRSFGALGGVPRRGIYDNMKTAVDKVNKGKGRTVNARFSVMCAHY
FT LFDPDFCNVASGWEKGIVEKNVQDSRRRIWLDAQNCMFHTFEELNVWLGQRCRTLWAE
FT LVHPQYNGLTVAEVLELEQAEMMPMPTAFDGYVERTVRVSSTCLISVARNRYSVPCER
FT VGQWVSSRLYPSRIVVIADETVIASHERLFDRDQVGFDWQHYIPLIERKPGALRNGAP
FT FADLPKPLQLLKRGLRRHTNGDRIMMQVLAAVPIAGLEPVLVAVELVLESGSLSADHI
FT LNVVARLTSTAPPPCVETSLQLKVAPVANTARYDRLRTTDEENRNA"
FT gene 1339771..1340574
FT /locus_tag="PSPPH_1141"
FT /note="PSPPH1141"
FT CDS 1339771..1340574
FT /locus_tag="PSPPH_1141"
FT /note="identified by similarity to GB:BAC55320.2; match to
FT protein family HMM PF01695"
FT /codon_start=1
FT /transl_table=11
FT /product="IS53, transposase IstB"
FT /protein_id="AAZ33209.1"
FT /db_xref="GI:71553998"
FT /translation="MRDLMTELKELRLHGMASAWEELVSQGTASTASSKWLLEHLLQQ
FT EHADRAVRSVNHQMNMAKLPMHRDLAGFDFSASSADARLVSDLSSLAFTETAQNVVFI
FT GGPGTGKTHLASALAVSGITAYNKRVRFFSTVDLVNLLEREKYDGKAGRIAQALLRTD
FT LVILNELGYLPFSQSGGALLFHLLSKLYEHTSVVITTNLSFSEWSSVFGDAKMTTALL
FT DRLTHHCHIVETGNESYRLQHSTLAAQTKIKTRERKRKDGNDIEDDEPF"
FT repeat_region complement(1549882..1551255)
FT /rpt_family="IS256"
FT /db_xref="ISFinder:ISPsy17"
FT /mobile_element="insertion sequence:ISPsy17"
FT /note="ISPsy17.9"
FT /primary_name="ISPsy17"
FT /synonym="ISPsy18"
FT gene complement(1549943..1551202)
FT /locus_tag="PSPPH_1336"
FT /note="PSPPH1336"
FT CDS complement(1549943..1551202)
FT /locus_tag="PSPPH_1336"
FT /note="identified by match to protein family HMM PF00872"
FT /codon_start=1
FT /transl_table=11
FT /protein_id="AAZ32996.1"
FT /db_xref="GI:71553785"
FT /translation="MPTKKKSANATARELPSIPQELIEQFVKGPMSAEAIQDASMAFK
FT KALIERALGAELGHHLGYPQGAERPKESTNQRNGKSSKTVLTDDGPLRLDIPRDRDGS
FT FAPILIPKHERRFTGFDDKIIAMYARGMTVREIRAFLSEQYGTDVSHDFISSVTDAVM
FT EEVGAWQQRPLEPMYPVIFFDALRVKIRDEGLVCNKAIYLALGVLPDGTRDILGIWIE
FT STEGAKFWMKVFNDLKTRGVEDVLIAVTDGLKGIPEALGAVFPATTLQTCIVHLIRNS
FT LDYAAWDKRRALAKALKPIYQAINADVAEQELNAFEAGPWGKQYPTVVAAWRRAWDRV
FT IPFFVFPAGIRKVVYTTNAIESINAQLRKIIKTRGHFPTDEAATKLIWLGLRNITANW
FT GHAAHDWKVAMNQFAILYGDRFTRPSW"
FT /product="ISPsy17, transposase"
FT repeat_region complement(1584418..1585791)
FT /rpt_family="IS256"
FT /db_xref="ISFinder:ISPsy17"
FT /mobile_element="insertion sequence:ISPsy17"
FT /note="ISPsy17.10"
FT /primary_name="ISPsy17"
FT /synonym="ISPsy18"
FT gene complement(1584479..1585738)
FT /locus_tag="PSPPH_1365"
FT /note="PSPPH1365"
FT CDS complement(1584479..1585738)
FT /locus_tag="PSPPH_1365"
FT /note="identified by match to protein family HMM PF00872"
FT /codon_start=1
FT /transl_table=11
FT /protein_id="AAZ36376.1"
FT /db_xref="GI:71557165"
FT /translation="MPTKKKSANATARELPSIPQELIEQFVKGPMSAEAIQDASMAFK
FT KALIERALGAELGHHLGYPQGAERPEGATNQRNGKSSKTVLTDDGPLRLDIPRDRDGS
FT FAPILIPKHERRFTGFDDKIIAMYARGMTVREIRAFLSEQYGTDVSHDFISSVTDAVM
FT EEVGAWQQRPLEPMYPVIFFDALRVKIRDEGLVCNKAIYLALGVLPDGTRDILGIWIE
FT STEGAKFWMKVFNDLKTRGVEDVLIAVTDGLKGIPEALGAVFPATTLQTCIVHLIRNS
FT LDYAAWDKRRALAKALKPIYQAINADVVEQELNAFEAGPWGKQYPTVVAAWRRAWDRV
FT IPFFVFPAGIRKVVYTTNAIESINAQLRKIIKTRGHFPTDEAATKLIWLGLRNITANW
FT GHAAHDWKVAMNQFAILYGDRFTRPSW"
FT /product="ISPsy17, transposase"
FT repeat_region 1593368..1594545
FT /rpt_family="IS5"
FT /db_xref="ISFinder:ISPsy19"
FT /mobile_element="insertion sequence:ISPsy19"
FT /primary_name="ISPsy19"
FT /note="ISPsy19.9"
FT gene 1593426..1594529
FT /locus_tag="PSPPH_1372"
FT /note="PSPPH1372"
FT CDS 1593426..1594529
FT /locus_tag="PSPPH_1372"
FT /note="identified by match to protein family HMM PF01609"
FT /codon_start=1
FT /transl_table=11
FT /product="ISPsy19, transposase"
FT /protein_id="AAZ37729.1"
FT /db_xref="GI:71558518"
FT /translation="MPKTGRPRSIAAEHYPVLVKLAHAQPYSSQAELALVFFAETGIT
FT AHPDTFAKALKMAGITRVKQRAKGSFQSPEPNKAYGYNETHRRQLPEQLYPSCLTDTE
FT WALVADLFESQGGRGVPPLHSRRTLLEACCYVVRTGCSWRMLPRDFPHWDNVYKTFRR
FT WSAQGKFEQMHDRLRAQWREREERADSPSAAILDSQSTRSSPQGGDSGYDAGKKVKGR
FT KRSLIVDTLGLLLAVSISAASVQDRDAADDAVAYSKEKYPSLSTLFVDSAYAGKWAQR
FT THQLHAIDVQVIRGPNNRRTGQWHSEQGDLFSVEPVQTGFVVMPKRWVVERTHAWNER
FT ARRLIMHHDRLFAVSEAWVWLAEARILARRLTT"
FT repeat_region 1683537..1684910
FT /rpt_family="IS256"
FT /db_xref="ISFinder:ISPsy17"
FT /mobile_element="insertion sequence:ISPsy17"
FT /note="ISPsy17.11"
FT /primary_name="ISPsy17"
FT /synonym="ISPsy18"
FT gene 1683590..1684849
FT /locus_tag="PSPPH_1442"
FT /note="PSPPH1442"
FT CDS 1683590..1684849
FT /locus_tag="PSPPH_1442"
FT /note="identified by match to protein family HMM PF00872"
FT /codon_start=1
FT /transl_table=11
FT /protein_id="AAZ35795.1"
FT /db_xref="GI:71556584"
FT /translation="MPTKKKSANATARELPSIPQELIEQFVKGPMSAEAIQDASMAFK
FT KALIERALGAELGHHLGYPQGAERPEGATNQRNGKSSKTVLTDDGPLRLDIPRDRDGS
FT FASILIPKHERRFTGFDDKIIAMYARGMTVREIRAFLSEQYGTDVSHDFISSVTDAVM
FT EEVGAWQQRPLEPMYPVIFFDALRVKIRDEGLVCNKAIYLALGVLPDGTRDILGIWIE
FT STEGAKFWMKVFNDLKTRGVEDVLIAVTDGLKGIPEALGAVFPATTLQTCIVHLIRNS
FT LDYAAWDKRRALAKALKPIYQAINADVAEQELNAFEAGPWGKQYPTVVAAWRRAWDRV
FT IPFFVFPAGIRKVVYMTNAIESINAQLRKIIKTRGHFPTDEAATKLIWLGLRNITANW
FT GHAAHDWKVAMNQFAILYGDRFTRPSW"
FT /product="ISPsy17, transposase"
FT repeat_region complement(1686167..1686464)
FT /note="ISPsy24.T1"
FT /rpt_family="IS3"
FT /db_xref="ISFinder:ISPsy24"
FT /mobile_element="insertion sequence:ISPsy24"
FT /primary_name="ISPsy24"
FT /color=10
FT repeat_region 1686979..1687825
FT /note="ISPsy22.T2"
FT /rpt_family="IS5"
FT /db_xref="ISFinder:ISPsy22"
FT /mobile_element="insertion sequence:ISPsy22"
FT /primary_name="ISPsy22"
FT /color=10
FT repeat_region 1687826..1688467
FT /rpt_family="IS256"
FT /db_xref="ISFinder:ISPsy17"
FT /mobile_element="insertion sequence:ISPsy17"
FT /color=10
FT /note="ISPsy17.T4"
FT /primary_name="ISPsy17"
FT /synonym="ISPsy18"
FT repeat_region complement(1731512..1732689)
FT /rpt_family="IS5"
FT /db_xref="ISFinder:ISPsy19"
FT /mobile_element="insertion sequence:ISPsy19"
FT /primary_name="ISPsy19"
FT /note="ISPsy19.10"
FT gene complement(1731528..1732631)
FT /locus_tag="PSPPH_1490"
FT /note="PSPPH1490"
FT CDS complement(1731528..1732631)
FT /locus_tag="PSPPH_1490"
FT /note="identified by match to protein family HMM PF01609"
FT /codon_start=1
FT /transl_table=11
FT /product="ISPsy19, transposase"
FT /protein_id="AAZ35287.1"
FT /db_xref="GI:71556076"
FT /translation="MPKTGRPRSIAAEHYPVLVKLAHAQPYSSQAELALVFFAETGIT
FT AHPDTFAKALKMAGITRVKQRAKGSFQSPEPNKAYGYNETHRRQLPEQLYPSCLTDTE
FT WALVADLFESQGGRGVPPLHSRRTLLEACCYVVRTGCSWRMLPRDFPHWDNVYKTFRR
FT WSAQGKFEQMHDRLRAQWREREERADSPSAAILDSQSTRSSPQGGDSGYDAEKKVKGR
FT KRSLIVDTLGLLLAVSISAASVQDRDAADDAVAYSKEKYPSLSTLFVDSAYAGKWAQR
FT THQLHAIDVQVIRGPNNRRTGQWHSEQGDLFSVEPVQTGFVVMPKRWVVERTHAWNER
FT ARRLIMHHDRLFAVSEAWVWLAEARILARRLTT"
FT repeat_region complement(1745509..1746882)
FT /rpt_family="IS256"
FT /db_xref="ISFinder:ISPsy17"
FT /mobile_element="insertion sequence:ISPsy17"
FT /note="ISPsy17.12"
FT /primary_name="ISPsy17"
FT /synonym="ISPsy18"
FT gene complement(1745570..1746829)
FT /locus_tag="PSPPH_1505"
FT /note="PSPPH1505"
FT CDS complement(1745570..1746829)
FT /locus_tag="PSPPH_1505"
FT /note="identified by match to protein family HMM PF00872"
FT /codon_start=1
FT /transl_table=11
FT /protein_id="AAZ34281.1"
FT /db_xref="GI:71555070"
FT /translation="MPTKKKSANATARELPSIPQELIEQFVKGPMSAEAIQDASMAFK
FT KALIERALGAELGHHLGYPQGAERPEGATNQRNGKSSKTVLTDDGPLRLDIPRDRDGS
FT FAPILIPKHERRFTGFDDKIIAMYARGMTVREIRAFLSEQYGTDVSHDFISSVTDAVM
FT EEVGAWQQRPLEPMYPVIFFDALRVKIRDEGLVCNKAIYLALGVLPDGTRDILGIWIE
FT STEGAKFWMKVFNDLKTRGVEDVLIAVTDGLKGIPEALGAVFPATTLQTCIVHLIRNS
FT LDYAAWDKRRALAKALKPIYQAINADVAEQELNAFEAGPWGKQYPTVVAAWRRAWDRV
FT IPFFVFPAGIRKVVYMTNAIESINAQLRKIIKTRGHFPTDEAATKLIWLGLRNITANW
FT GHAAHDWKVAMNQFAILYGDRFTRPSW"
FT /product="ISPsy17, transposase"
FT repeat_region 1774559..1774870
FT /note="ISPsy16.T1"
FT /rpt_family="IS110"
FT /db_xref="ISFinder:ISPsy16"
FT /mobile_element="insertion sequence:ISPsy16"
FT /primary_name="ISPsy16"
FT /color=10
FT repeat_region complement(1783301..1784615)
FT /note="IS51.2"
FT /rpt_family="IS3"
FT /mobile_element="insertion sequence:IS51"
FT /db_xref="ISFinder:IS51"
FT /primary_name="IS51"
FT /synonym="ISPsy21"
FT gene complement(1783340..1784245)
FT /locus_tag="PSPPH_1527"
FT /note="PSPPH1527"
FT CDS complement(1783340..1784245)
FT /locus_tag="PSPPH_1527"
FT /note="identified by similarity to GB:CAD42759.1; match to
FT protein family HMM PF00665"
FT /codon_start=1
FT /transl_table=11
FT /protein_id="AAZ34715.1"
FT /db_xref="GI:71555504"
FT /translation="MKTFIDENRQSYGVEPICKVLPIAPSTYYRYAAQQADPSQQSAR
FT AQRDQELGEHIQRVWDKHFHVYGMRKVWRQLLREGQQVARCTVQRLMGELGLQGVVRG
FT KPVKTTVSDQARPCPQDHVNRQFVAECPNALWVSDFTYVSTWQGFVYVAFIVDVFARF
FT IVGWKVSSSARTDFALDALEQALYARRPVKQGGLIHHSDRGVQYVSIRYTERLVEAGI
FT EPSVGSVGDSYDNALAETINGLYKAEVIHRRSWPTRGGAVELETLKWVDWFNHRRLLE
FT PIGHIPPVEAEAIYYQQLTESAHVA"
FT /product="IS51, transposase orfB"
FT gene complement(1784242..1784565)
FT /locus_tag="PSPPH_1528"
FT /note="PSPPH1528"
FT CDS complement(1784242..1784565)
FT /locus_tag="PSPPH_1528"
FT /note="identified by match to protein family HMM PF01527"
FT /codon_start=1
FT /transl_table=11
FT /protein_id="AAZ37605.1"
FT /db_xref="GI:71558394"
FT /translation="MKKLPKYSPEVRERAIRMVFEHLPEYESQWATLSAIAPKIGCTP
FT ETLRLWVRQSKRNSGQRDGLSTVERERVKLLERENRQLRQANEILRKASAYFAQAELD
FT RPFKR"
FT /product="IS51, transposase orfA"
FT repeat_region 1784616..1784960
FT /note="IS53.T3"
FT /note="Truncated; present only the last 345 nt"
FT /color=10
FT /rpt_family="IS21"
FT /mobile_element="insertion sequence:IS53"
FT /db_xref="ISFinder:IS53"
FT /primary_name="IS53"
FT /synonym="ISPsy20"
FT repeat_region 1851063..1852436
FT /rpt_family="IS256"
FT /db_xref="ISFinder:ISPsy17"
FT /mobile_element="insertion sequence:ISPsy17"
FT /note="ISPsy17.13"
FT /primary_name="ISPsy17"
FT /synonym="ISPsy18"
FT gene 1851116..1852375
FT /locus_tag="PSPPH_1597"
FT /note="PSPPH1597"
FT CDS 1851116..1852375
FT /locus_tag="PSPPH_1597"
FT /note="identified by match to protein family HMM PF00872"
FT /codon_start=1
FT /transl_table=11
FT /protein_id="AAZ35675.1"
FT /db_xref="GI:71556464"
FT /translation="MPTKKKSANATARELPSIPQELIEQFVKGPMSAEAIQDASMAFK
FT KALIERALGAELGHHLGYPQGAERPEESTNQRNGKSSKTVLTDDGPLRLDIPRDRDGS
FT FAPILIPKHERRFTGFDDKIIAMYARGMTVREIRAFLSEQYGTDVSHDFISSVTDAVM
FT EEVGAWQQRPLEPMYPVIFFDALRVKIRDEGLVCNKAIYLALGVLPDGTRDILGIWIE
FT STEGAKFWMKVFNDLKTRGVEDVLIAVTDGLKGIPEALGAVFPATTLQTCIVHLIRNS
FT LDYAAWDKRRALAKALKPIYQAINADVAEQELNAFEAGPWGKQYPTVVAAWRRAWDRV
FT IPFFVFPAGIRKVVYTTNAIESINAQLRKIIKTRGHFPTDEAATKLIWLGLRNITANW
FT GHAAHDWKVAMNQFAILYGDRFTRPSW"
FT /product="ISPsy17, transposase"
FT repeat_region complement(1857954..1859131)
FT /rpt_family="IS5"
FT /db_xref="ISFinder:ISPsy19"
FT /mobile_element="insertion sequence:ISPsy19"
FT /primary_name="ISPsy19"
FT /note="ISPsy19.11"
FT gene complement(1857970..1859073)
FT /locus_tag="PSPPH_1600"
FT /note="PSPPH1600"
FT CDS complement(1857970..1859073)
FT /locus_tag="PSPPH_1600"
FT /note="identified by match to protein family HMM PF01609"
FT /codon_start=1
FT /transl_table=11
FT /product="ISPsy19, transposase"
FT /protein_id="AAZ33034.1"
FT /db_xref="GI:71553823"
FT /translation="MPKTGRPRSIAAEHYPVLVKLAHAQPYSSQAELALVFFAETGIT
FT AHPDTFAKALKMAGITRVKQRAKGSFQSPEPNKAYGYNETHRRQLPEQLYPSCLTDTE
FT WALVADLFESQGGRGVPPLHSRRTLLEACCYVVRTGCSWRMLPRDFPHWDNVYKTFRR
FT WSAQGKFEQMHDRLRAQWREREERADSPSAAILDSQSTRSSPQGGDSGYDAGKKVKGR
FT KRSLIVDTLGLLLAVSISAASVQDRDAADDAVAYSKEKYPSLSTLFVDSAYAGKWAQR
FT THQLHAIDVQVIRGPNNRRTGQWHSEQGDLFSVEPVQTGFVVMPKRWVVERTHAWNER
FT ARRLIMHHDRLFAVSEAWVWLAEARILARRLTT"
FT repeat_region complement(1863928..1865019)
FT /note="ISPsy19.T2"
FT /note="Lacks the first 83 nt in 5'"
FT /rpt_family="IS5"
FT /db_xref="ISFinder:ISPsy19"
FT /mobile_element="insertion sequence:ISPsy19"
FT /color=10
FT /primary_name="ISPsy19"
FT repeat_region 1953034..1953277
FT /rpt_family="IS5"
FT /db_xref="ISFinder:ISPsy19"
FT /mobile_element="insertion sequence:ISPsy19"
FT /color=10
FT /primary_name="ISPsy19"
FT /note="ISPsy19.T3"
FT repeat_region 2012332..2013509
FT /rpt_family="IS5"
FT /db_xref="ISFinder:ISPsy19"
FT /mobile_element="insertion sequence:ISPsy19"
FT /primary_name="ISPsy19"
FT /note="ISPsy19.12"
FT gene 2012390..2013493
FT /locus_tag="PSPPH_1735"
FT /note="PSPPH1735"
FT CDS 2012390..2013493
FT /locus_tag="PSPPH_1735"
FT /note="identified by match to protein family HMM PF01609"
FT /codon_start=1
FT /transl_table=11
FT /product="ISPsy19, transposase"
FT /protein_id="AAZ37416.1"
FT /db_xref="GI:71558205"
FT /translation="MPKTGRPRSIAAEHYPVLVKLAHAQPYSSQAELALVFFAETGIT
FT AHPDTFAKALKMAGITRVKQRAKGSFQSPEPNKAYGYNETHRRQLPEQLYPSCLTDTE
FT WALVADLFESQGGRGVPPLHSRRTLLEACCYVVRTGCSWRMLPRDFPHWDNVYKTFRR
FT WSAQGKFEQMHDRLRAQWREREERADSPSAAILDSQSTRSSPQGGDSGYDAGKKVKGR
FT KRSLIVDTLGLLLAVSISAASVQDRDAADDAVAYSKEKYPSLSTLFVDSAYAGKWAQR
FT THQLHAIDVQVIRGPNNRRTGQWHSEQGDLFSVEPVQTGFVVMPKRWVVERTHAWNER
FT ARRLIMHHDCLFAVSEAWVWLAEARILARRLTT"
FT repeat_region 2141202..2142436
FT /note="ISPsy24.1"
FT /rpt_family="IS3"
FT /db_xref="ISFinder:ISPsy24"
FT /mobile_element="insertion sequence:ISPsy24"
FT /primary_name="ISPsy24"
FT gene 2141266..2141574
FT /locus_tag="PSPPH_1844"
FT /note="PSPPH1844"
FT CDS 2141266..2141574
FT /locus_tag="PSPPH_1844"
FT /note="identified by similarity to GB:AAT35126.1; match to
FT protein family HMM PF01527"
FT /codon_start=1
FT /transl_table=11
FT /product="ISPsy24, transposase orfA"
FT /protein_id="AAZ36513.1"
FT /db_xref="GI:71557302"
FT /translation="MTKQRRTFSAEFKREAAGLVLDQGYSHIEASRSLGVVESALRRW
FT VNQLQQERNGVTPQSKALTPEQQKIQELEARIARLEREKSILKKATALLMSEEHERMR
FT "
FT gene 2141607..2142428
FT /locus_tag="PSPPH_1845"
FT /note="PSPPH1845"
FT CDS 2141607..2142428
FT /locus_tag="PSPPH_1845"
FT /note="identified by similarity to GB:AAO56533.1; match to
FT protein family HMM PF00665"
FT /codon_start=1
FT /transl_table=11
FT /product="ISPsy24, transposase orfB"
FT /protein_id="AAZ33748.1"
FT /db_xref="GI:71554537"
FT /translation="MLCEAFEVPRSCYYNHRLRRRNPDVERVRLRSRVNELFTQSRSA
FT AGSRSIVLMMHEDGEQIGRFKVRSLMRELGLISKQPGSHAYRKATVERPDIPNILNRA
FT FDVPAPNQVWCGDITYIWAQGKWHYLAVVMDLFARRVVGWALSSKPDTDLVIKALDMA
FT YEQRGKPQGLLFHSDQGAQYGSRQFRQRLWRYRIRQSMSRRGNCWDNAPMERVFRSLK
FT TEWIPTVGYMTAQEAQRDISHYLMHRYNWIRPHQFNNGLAPAQSEKRLNVVSGIS"
FT repeat_region complement(join(2178293..2179530,2180816..2180951))
FT /note="ISPsy17.T5"
FT /note="Complete but for the internal insertion of ISPsy19;
FT produced perfect 8 nt target repetition"
FT /rpt_family="IS256"
FT /db_xref="ISFinder:ISPsy17"
FT /mobile_element="insertion sequence:ISPsy17"
FT /color=10
FT /primary_name="ISPsy17"
FT /synonym="ISPsy18"
FT repeat_region complement(2179535..2179634)
FT /rpt_family="ISNCY"
FT /mobile_element="Miniature inverted-repeats transposable
FT element:MITEPsy1"
FT /note="MITEPsy1.3"
FT repeat_region 2179638..2180815
FT /rpt_family="IS5"
FT /db_xref="ISFinder:ISPsy19"
FT /mobile_element="insertion sequence:ISPsy19"
FT /primary_name="ISPsy19"
FT /note="ISPsy19.13"
FT gene 2179696..2180799
FT /locus_tag="PSPPH_1878"
FT /note="PSPPH1878"
FT CDS 2179696..2180799
FT /locus_tag="PSPPH_1878"
FT /note="identified by match to protein family HMM PF01609"
FT /codon_start=1
FT /transl_table=11
FT /product="ISPsy19, transposase"
FT /protein_id="AAZ37896.1"
FT /db_xref="GI:71558685"
FT /translation="MPKTGRPRSIAAEHYPVLVKLAHAQPYSSQAELALVFFAETGIT
FT AHPDTFAKALKMAGITRVKQRAKGSFQSPEPNKAYGYNETHRRQLPEQLYPSCLTDTE
FT WALVADLFESQGGRGVPPLHSRRTLLEACCYVVRTGCSWRMLPRDFPHWDNVYKTFRR
FT WSAQGKFEQMHDRLRAQWREREERADSPSAAILDSQSTRSSPQGGDSGYDAGKKVKGR
FT KRSLIVDTLGLLLAVSISAASVQDRDAADDAVAYSKEKYPSLSTLFVDSAYAGKWAQR
FT THQLHAIDVQVIRGPNNRRTGQWHSEQGDLFSVEPVQTGFVVMPKRWVVERTHAWNER
FT ARRLIMHHDRLFAVSEAWVWLAEARILARRLTT"
FT repeat_region complement(2187680..2189053)
FT /rpt_family="IS256"
FT /db_xref="ISFinder:ISPsy17"
FT /mobile_element="insertion sequence:ISPsy17"
FT /note="ISPsy17.14"
FT /primary_name="ISPsy17"
FT /synonym="ISPsy18"
FT gene complement(2187741..2189000)
FT /locus_tag="PSPPH_1887"
FT /note="PSPPH1887"
FT CDS complement(2187741..2189000)
FT /locus_tag="PSPPH_1887"
FT /note="identified by match to protein family HMM PF00872"
FT /codon_start=1
FT /transl_table=11
FT /protein_id="AAZ37801.1"
FT /db_xref="GI:71558590"
FT /translation="MPTKKKSANATARELPSIPQELIEQFVKGPMSAEAIQDASMAFK
FT KALIERALGAELGHHLGYPQGAERPEGATNQRNGKSSKTVLTDDGPLRLDIPRDRDGS
FT FASILIPKHERRFTGFDDKIIAMYARGMTVREIRAFLSEQYGTDVSHDFISSVTDAVM
FT EEVGAWQQRPLEPMYPVIFFDALRVKIRDEGLVCNKAIYLALGVLPDGTRDILGIWIE
FT STEGAKFWMKVFNDLKTRGVEDVLIAVTDGLKGIPEALGAVFPATTLQTCIVHLIRNS
FT LDYAAWDKRRALAKALKPIYQAINADVAEQELNAFEAGPWGKQYPTVVAAWRRAWDRV
FT IPFFVFPAGIRKVVYTTNAIESINAQLRKIIKTRGHFPTDEAATKLIWLGLRNITANW
FT GHAAHDWKVAMNQFAILYGDRFTRPSW"
FT /product="ISPsy17, transposase"
FT repeat_region 2207391..2208764
FT /rpt_family="IS256"
FT /db_xref="ISFinder:ISPsy17"
FT /mobile_element="insertion sequence:ISPsy17"
FT /note="ISPsy17.15"
FT /primary_name="ISPsy17"
FT /synonym="ISPsy18"
FT gene 2207444..2208703
FT /locus_tag="PSPPH_1902"
FT /note="PSPPH1902"
FT CDS 2207444..2208703
FT /locus_tag="PSPPH_1902"
FT /note="identified by match to protein family HMM PF00872"
FT /codon_start=1
FT /transl_table=11
FT /protein_id="AAZ34710.1"
FT /db_xref="GI:71555499"
FT /translation="MPTKKKSANATARELPSIPQELIEQFVKGPMSAEAIQDASMAFK
FT KALIERALGAELGHHLGYPQGAERPEGATNQRNGKSSKTVLTDDGPLRLDIPRDRDGS
FT FAPILIPKHERRFTGFDDKIIAMYARGMTVREIRAFLSEQYGTDVSHDFISSVTDAVM
FT EEVGAWQQRPLEPMYPVIFFDALRVKIRDEGLVCNKAIYLALGVLPDGTRDILGIWIE
FT STEGAKFWMKVFNDLKTRGVEDVLIAVTDGLKGIPEALGAVFPATTLQTCIVHLIRNS
FT LDYAAWDKRRALAKALKPIYQAINADVAEQELNAFEAGPWGKQYPTVVAAWRRAWDRV
FT IPFFVFPAGIRKVVYTTNAIESINAQLRKIIKTRGHFPTDEAATKLIWLGLRNITANW
FT GHAAHDWKVAMNQFAILYGDRFTRPSW"
FT /product="ISPsy17, transposase"
FT repeat_region complement(2342149..2343522)
FT /rpt_family="IS256"
FT /db_xref="ISFinder:ISPsy17"
FT /mobile_element="insertion sequence:ISPsy17"
FT /note="ISPsy17.16"
FT /primary_name="ISPsy17"
FT /synonym="ISPsy18"
FT gene complement(2342210..2343469)
FT /locus_tag="PSPPH_1992"
FT /note="PSPPH1992"
FT CDS complement(2342210..2343469)
FT /locus_tag="PSPPH_1992"
FT /note="identified by match to protein family HMM PF00872"
FT /codon_start=1
FT /transl_table=11
FT /protein_id="AAZ36641.1"
FT /db_xref="GI:71557430"
FT /translation="MPTKKKSANATARELPSIPQELIEQFVKGPMSAEAIQDASMAFK
FT KALIERALGAELGHHLGYPQGAERPEESTNQRNGKSSKTVLTDDGPLRLDIPRDRDGS
FT FAPILIPKHERRFTGFDDKIIAMYARGMTVREIRAFLSEQYGTDVSHDFISSVTDAVM
FT EEVGAWQQRPLEPMYPVIFFDALRVKIRDEGLVCNKAIYLALGVLPDGTRDILGIWIE
FT STEGAKFWMKVFNDLKTRGVEDVLIAVTDGLKGIPEALGAVFPATTLQTCIVHLIRNS
FT LDYAAWDKRRALAKALKPIYQAINADVAEQELNAFEAGPWGKQYPTVVAAWRRAWDRV
FT IPFFVFPAGIRKVVYTTNAIESINAQLRKIIKTRGHFPTDEAATKLIWLGLRNITANW
FT GHAAHDWKVAMNQFAILYGDRFTRPSW"
FT /product="ISPsy17, transposase"
FT repeat_region 2354550..2355727
FT /rpt_family="IS5"
FT /db_xref="ISFinder:ISPsy19"
FT /mobile_element="insertion sequence:ISPsy19"
FT /primary_name="ISPsy19"
FT /note="ISPsy19.14"
FT gene 2354608..2355711
FT /locus_tag="PSPPH_2006"
FT /note="PSPPH2006"
FT CDS 2354608..2355711
FT /locus_tag="PSPPH_2006"
FT /note="identified by match to protein family HMM PF01609"
FT /codon_start=1
FT /transl_table=11
FT /product="ISPsy19, transposase"
FT /protein_id="AAZ36423.1"
FT /db_xref="GI:71557212"
FT /translation="MPKTGRPRSIAAEHYPVLVKLAHAQPYSSQAELALVFFAETGIT
FT AHPDTFAKALKMAGITRVKQRAKGSFQSPEPNKAYGYNETHRRQLPEQLYPSCLTDTE
FT WALVADLFESQGGRGVPPLHSRRTLLEACCYVVRTGCSWRMLPRDFPHWDNVYKTFRR
FT WSAQGKFEQMHDRLRAQWREREERADSPSAAILDSQSTRSSPQGGDSGYDAGKKVKGR
FT KRSLIVDTLGLLLAVSISAASVQDRDAADDAVAYSKEKYPSLSTLFVDSAYAGKWAQR
FT THQLHAIDVQVIRGPNNRRTGQWHSEQGDLFSVEPVQTGFVVMPKRWVVERTHAWNER
FT ARRLIMHHDRLFAVSEAWVWLAEARILARRLTT"
FT repeat_region complement(2366491..2367864)
FT /rpt_family="IS256"
FT /db_xref="ISFinder:ISPsy17"
FT /mobile_element="insertion sequence:ISPsy17"
FT /note="ISPsy17.17"
FT /primary_name="ISPsy17"
FT /synonym="ISPsy18"
FT gene complement(2366552..2367811)
FT /locus_tag="PSPPH_2014"
FT /note="PSPPH2014"
FT CDS complement(2366552..2367811)
FT /locus_tag="PSPPH_2014"
FT /note="identified by match to protein family HMM PF00872"
FT /codon_start=1
FT /transl_table=11
FT /protein_id="AAZ34492.1"
FT /db_xref="GI:71555281"
FT /translation="MPTKKKSANATARELPSIPQELIEQFVKGPMSAEAIQDASMAFK
FT KALIERALGAELGHHLGYPQGAERPEESTNQRNGKSSKTVLTDDGPLRLDIPRDRDGS
FT FAPILIPKHERRFTGFDDKIIAMYARGMTVREIRAFLSEQYGTDVSHDFISSVTDAVM
FT EEVGAWQQRPLEPMYPVIFFDALRVKIRDEGLVCNKAIYLALGVLPDGTRDILGIWIE
FT STEGAKFWMKVFNDLKTRGVEDVLIAVTDGLKGIPEALGAVFPATTLQTCIVHLIRNS
FT LDYAAWDKRRALAKALKPIYQAINADVAEQELNAFEAGPWGKQYPTVVAAWRRAWDRV
FT IPFFVFPAGIRKVVYTTNAIESINAQLRKIIKTRGHFPTDEAATKLIWLGLRNITANW
FT GHAAHDWKVAMNQFAILYGDRFTRPSW"
FT /product="ISPsy17, transposase"
FT repeat_region complement(join(2448835..2449541,2449542..2449648))
FT /note="ISPsy17.T6"
FT /note="Truncated; internal deletion of 558 nt"
FT /rpt_family="IS256"
FT /db_xref="ISFinder:ISPsy17"
FT /mobile_element="insertion sequence:ISPsy17"
FT /color=10
FT /primary_name="ISPsy17"
FT /synonym="ISPsy18"
FT repeat_region 2511114..2512487
FT /rpt_family="IS256"
FT /db_xref="ISFinder:ISPsy17"
FT /mobile_element="insertion sequence:ISPsy17"
FT /note="ISPsy17.18"
FT /primary_name="ISPsy17"
FT /synonym="ISPsy18"
FT gene 2511167..2512426
FT /locus_tag="PSPPH_2156"
FT /note="PSPPH2156"
FT CDS 2511167..2512426
FT /locus_tag="PSPPH_2156"
FT /note="identified by match to protein family HMM PF00872"
FT /codon_start=1
FT /transl_table=11
FT /protein_id="AAZ37676.1"
FT /db_xref="GI:71558465"
FT /translation="MPTKKKSANATARELPSIPQELIEQFVKGPMSAEAIQDASMAFK
FT KALIERALGAELGHHLGYPQGAERPEESTNQRNGKSSKTVLTDDGPLRLDIPRDRDGS
FT FAPILIPKHERRFTGFDDKIIAMYARGMTVREIRAFLSEQYGTDVSHDFISSVTDAVM
FT EEVGAWQQRPLEPMYPVIFFDALRVKIRDEGLVCNKAIYLALGVLPDGTRDILGIWIE
FT STEGAKFWMKVFNDLKTRGVEDVLIAVTDGLKGIPEALGAVFPATTLQTCIVHLIRNS
FT LDYAAWDKRRALAKALKPIYQAINADVAEQELNAFEAGPWGKQYPTVVAAWRRAWDRV
FT IPFFVFPAGIRKVVYTTNAIESINAQLRKIIKTRGHFPTDEAATKLIWLGLRNITANW
FT GHAAHDWKVAMNQFAILYGDRFTRPSW"
FT /product="ISPsy17, transposase"
FT repeat_region complement(2525293..2526666)
FT /rpt_family="IS256"
FT /db_xref="ISFinder:ISPsy17"
FT /mobile_element="insertion sequence:ISPsy17"
FT /note="ISPsy17.19"
FT /primary_name="ISPsy17"
FT /synonym="ISPsy18"
FT gene complement(2525354..2526613)
FT /locus_tag="PSPPH_2170"
FT /note="PSPPH2170"
FT CDS complement(2525354..2526613)
FT /locus_tag="PSPPH_2170"
FT /note="identified by match to protein family HMM PF00872"
FT /codon_start=1
FT /transl_table=11
FT /protein_id="AAZ35673.1"
FT /db_xref="GI:71556462"
FT /translation="MPTKKKSANATARELPSIPQELIEQFVKGPMSAEAIQDASMAFK
FT KALIKRALGAELGHHLGYPQGAERPEESTNQRNGKSSKTVLTDDGPLRLDIPRDRDGS
FT FAPILIPKHERRFTGFDDKIIAMYARGMTVREIRAFLSEQYGTDVSHDFISSVTDAVM
FT EEVGAWQQRPLEPMYPVIFFDALRVKIRDEGLVCNKAIYLALGVLPDGTRDILGIWIE
FT STEGAKFWMKVFNDLKTRGVEDVLIAVTDGLKGIPEALGAVFPATTLQTCIVHLIRNS
FT LDYAAWDKRRALAKALKPIYQAINADVAEQELNAFEAGPWGKQYPTVVAAWRRAWDRV
FT IPFFVFPAGIRKVVYTTNAIESINAQLRKIIKTRGHFPTDEAATKLIWLGLRNITANW
FT GHAAHDWKVAMNQFAILYGDRFTRPSW"
FT /product="ISPsy17, transposase"
FT repeat_region 2650364..2650880
FT /rpt_family="IS5"
FT /db_xref="ISFinder:ISPsy2"
FT /mobile_element="insertion sequence:ISPsy2"
FT /note="ISPsy2.T3"
FT /primary_name="ISPsy2"
FT /color=10
FT repeat_region 2650970..2651380
FT /rpt_family="IS630"
FT /db_xref="ISFinder:ISPsy25"
FT /mobile_element="insertion sequence:ISPsy25"
FT /note="ISPsy25.T1"
FT /primary_name="ISPsy25"
FT /color=10
FT gene 2653002..2653115
FT /locus_tag="PSPPH_2286"
FT /note="PSPPH2286; transposase, degenerate; this region
FT contains one or more premature stops and/or frameshifts
FT which are not the result of sequencing error"
FT /pseudo
FT repeat_region complement(2653526..2654719)
FT /rpt_family="IS5"
FT /db_xref="ISFinder:ISPsy2"
FT /mobile_element="insertion sequence:ISPsy2"
FT /note="ISPsy2.3"
FT /primary_name="ISPsy2"
FT gene complement(2653672..2654652)
FT /locus_tag="PSPPH_2287"
FT /note="PSPPH2287"
FT repeat_region join(2654723..2655030,2655031..2655604)
FT /note="ISPsy19.T4"
FT /note="Truncated by internal deletion of 295 nt"
FT /rpt_family="IS5"
FT /db_xref="ISFinder:ISPsy19"
FT /mobile_element="insertion sequence:ISPsy19"
FT /color=10
FT /primary_name="ISPsy19"
FT repeat_region complement(2675601..2676778)
FT /rpt_family="IS5"
FT /db_xref="ISFinder:ISPsy19"
FT /mobile_element="insertion sequence:ISPsy19"
FT /primary_name="ISPsy19"
FT /note="ISPsy19.15"
FT gene complement(2675617..2676720)
FT /locus_tag="PSPPH_2308"
FT /note="PSPPH2308"
FT CDS complement(2675617..2676720)
FT /locus_tag="PSPPH_2308"
FT /note="identified by match to protein family HMM PF01609"
FT /codon_start=1
FT /transl_table=11
FT /product="ISPsy19, transposase"
FT /protein_id="AAZ37337.1"
FT /db_xref="GI:71558126"
FT /translation="MPKTGRPRSIAAEHYPVLVKLAHAQPYSSQAELALVFFAETGIT
FT AHPDTFAKALKMAGITRVKQRAKGSFQSPEPNKAYGYNETHRRQLPEQLYPSCLTDTE
FT WALVADLFESQGGRGVPPLHSRRTLLEACCYVVRTGCSWRMLPRDFPHWDNVYKTFRR
FT WSAQGKFEQMHDRLRAQWREREERADSPSAAILDSQSTRSSPQGGDSGYDAGKKVKGR
FT KRSLIVDTLGLLLAVSISAASVQDRDAADDAVAYSKEKYPSLSTLFVDSAYAGKWAQR
FT THQLHAIDVQVIRGPNNRRTGQWHSEQGDLFSVEPVQTGFVVMPKRWVVERTHAWNER
FT ARRLIMHHDCLFAVSEAWVWLAEARILARRLTT"
FT repeat_region 2682963..2684336
FT /note="ISPsy17.20"
FT /rpt_family="IS256"
FT /db_xref="ISFinder:ISPsy17"
FT /mobile_element="insertion sequence:ISPsy17"
FT /primary_name="ISPsy17"
FT /synonym="ISPsy18"
FT gene 2683016..2684275
FT /locus_tag="PSPPH_2312"
FT /note="PSPPH2312"
FT CDS 2683016..2684275
FT /locus_tag="PSPPH_2312"
FT /note="identified by match to protein family HMM PF00872"
FT /codon_start=1
FT /transl_table=11
FT /protein_id="AAZ37841.1"
FT /db_xref="GI:71558630"
FT /translation="MPTKKKSANATARELPSIPQELIEQFVKGPMSAEAIQDASMAFK
FT KALIERALGAELGHHLGYPQGAERPEESTNQRNGKSSKTVLTDDGPLRLDIPRDRDGS
FT FAPILIPKHERRFTGFDDKIIAMYARGMTVREIRAFLSEQYGTDVSHDFISSVTDAVM
FT EEVGAWQQRPLEPMYPVIFFDALRVKIRDEGLVCNKAIYLALGVLPDGTRDILGIWIE
FT STEGAKFWMKVFNDLKTRGVEDVLIAVTDGLKGIPEALGAVFPATTLQTCIVHLIRNS
FT LDYAAWDKRRALAKALKPIYQAINADVAEQELNAFEAGPWGKQYPTVVAAWRRAWDRV
FT IPFFVFPAGIRKVVYTTNAIESINAQLRKIIKTRGHFPTDEAATKLIWLGLRNITANW
FT GHAAHDWKVAMNQFAILYGDRFTRPSW"
FT /product="ISPsy17, transposase"
FT repeat_region 2822436..2823809
FT /rpt_family="IS256"
FT /db_xref="ISFinder:ISPsy17"
FT /mobile_element="insertion sequence:ISPsy17"
FT /note="ISPsy17.21"
FT /primary_name="ISPsy17"
FT /synonym="ISPsy18"
FT gene 2822489..2823748
FT /locus_tag="PSPPH_2441"
FT /note="PSPPH2441"
FT CDS 2822489..2823748
FT /locus_tag="PSPPH_2441"
FT /note="identified by match to protein family HMM PF00872"
FT /codon_start=1
FT /transl_table=11
FT /protein_id="AAZ33157.1"
FT /db_xref="GI:71553946"
FT /translation="MPTKKKSANATARELPSIPQELIEQFVKGPMSAEAIQDASMAFK
FT KALIERALGAELGHHLGYPQGAERPEESTNQRNGKSSKTVLTDDGPLRLDIPRDRDGS
FT FAPILIPKHERRFTGFDDKIIAMYARGMTVREIRAFLSEQYGTDVSHDFISSVTDAVM
FT EEVGAWQQRPLEPMYPVIFFDALRVKIRDEGLVCNKAIYLALGVLPDGTRDILGIWIE
FT STEGAKFWMKVFNDLKTRGVEDVLIAVTDGLKGIPEALGAVFPATTLQTCIVHLIRNS
FT LDYAAWDKRRALAKALKPIYQAINADVAEQELNAFEAGPWGKQYPTVVAAWRRAWDRV
FT IPFFVFPAGIRKVVYTTNAIESINAQLRKIIKTRGHFPTDEAATKLIWLGLRNITANW
FT GHAAHDWKVAMNQFAILYGDRFTRPSW"
FT /product="ISPsy17, transposase"
FT repeat_region 2831053..2832426
FT /rpt_family="IS256"
FT /db_xref="ISFinder:ISPsy17"
FT /mobile_element="insertion sequence:ISPsy17"
FT /note="ISPsy17.22"
FT /primary_name="ISPsy17"
FT /synonym="ISPsy18"
FT gene 2831106..2832365
FT /locus_tag="PSPPH_2450"
FT /note="PSPPH2450"
FT CDS 2831106..2832365
FT /locus_tag="PSPPH_2450"
FT /note="identified by match to protein family HMM PF00872"
FT /codon_start=1
FT /transl_table=11
FT /protein_id="AAZ35169.1"
FT /db_xref="GI:71555958"
FT /translation="MPTKKKSANATARELPSIPQELIEQFVKGPMSAEAIQDASMAFK
FT KALIKRALGAELGHHLGYPQGAERPEESTNQRNGKSSKTVLTDDGPLRLDIPRDRDGS
FT FAPILIPKHERRFTGFDDKIIAMYARGMTVREIRAFLSEQYGTDVSHDFISSVTDAVM
FT EEVGAWQQRPLEPMYPVIFFDALRVKIRDEGLVCNKAIYLALGVLPDGTRDILGIWIE
FT STEGAKFWMKVFNDLKTRGVEDVLIAVTDGLKGIPEALGAVFPATTLQTCIVHLIRNS
FT LDYAAWDKRRALAKALKPIYQAINADVAEQELNAFEAGPWGKQYPTVVAAWRRAWDRV
FT IPFFVFPAGIRKVVYTTNAIESINAQLRKIIKTRGHFPTDEAATKLIWLGLRNITANW
FT GHAAHDWKVAMNQFAILYGDRFTRPSW"
FT /product="ISPsy17, transposase"
FT repeat_region 2868521..2869698
FT /rpt_family="IS5"
FT /db_xref="ISFinder:ISPsy19"
FT /mobile_element="insertion sequence:ISPsy19"
FT /primary_name="ISPsy19"
FT /note="ISPsy19.16"
FT gene 2868579..2869682
FT /locus_tag="PSPPH_2484"
FT /note="PSPPH2484"
FT CDS 2868579..2869682
FT /locus_tag="PSPPH_2484"
FT /note="identified by match to protein family HMM PF01609"
FT /codon_start=1
FT /transl_table=11
FT /product="ISPsy19, transposase"
FT /protein_id="AAZ34232.1"
FT /db_xref="GI:71555021"
FT /translation="MPKTGRPRSIAAEHYPVLVKLAHAQPYSSQAELALVFFAETGIT
FT AHPDTFAKALKMAGITRVKQRAKGSFQSPEPNKAYGYNETHRRQLPEQLYPSCLTDTE
FT WALVADLFESQGGRGVPPLHSRRTLLEACCYVVRTGCSWRMLPRDFPHWDNVYKTFRR
FT WSAQGKFEQMHDRLRAQWREREERADSPSAAILDSQSTRSSPQGGDSGYDAGKKVKGR
FT KRSLIVDTLGLLLAVSISAASVQDRDAADDAVAYSKEKYPSLSTLFVDSAYAGKWAQR
FT THQLHAIDVQVIRGPNNRRTGQWHSEQGDLFSVEPVQTGFVVMPKRWVVERTHAWNER
FT ARRLIMHHDCLFAVSEAWVWLAEARILARRLTT"
FT repeat_region complement(2916491..2917668)
FT /rpt_family="IS5"
FT /db_xref="ISFinder:ISPsy19"
FT /mobile_element="insertion sequence:ISPsy19"
FT /primary_name="ISPsy19"
FT /note="ISPsy19.17"
FT gene complement(2916507..2917610)
FT /locus_tag="PSPPH_2531"
FT /note="PSPPH2531"
FT CDS complement(2916507..2917610)
FT /locus_tag="PSPPH_2531"
FT /note="identified by match to protein family HMM PF01609"
FT /codon_start=1
FT /transl_table=11
FT /product="ISPsy19, transposase"
FT /protein_id="AAZ37494.1"
FT /db_xref="GI:71558283"
FT /translation="MPKTGRPRSIAAEHYPVLVKLAHAQPYSSQAELALVFFAETGIT
FT AHPDTFAKALKMAGITRVKQRAKGSFQSPEPNKAYGYNETHRRQLPEQLYPSCLTDTE
FT WALVADLFESQGGRGVPPLHSRRTLLEACCYVVRTGCSWRMLPRDFPHWDNVYKTFRR
FT WSAQGKFEQMHDRLRAQWREREERADSPSAAILDSQSTRSSPQGGDSGYDAGKKVKGR
FT KRSLIVDTLGLLLAVSISAASVQDRDAADDAVAYSKEKYPSLSTLFVDSAYAGKWAQR
FT THQLHAIDVQVIRGPNNRRTGQWHSEQGDLFSVEPVQTGFVVMPKRWVVERTHAWNER
FT ARRLIMHHDCLFAVSEAWVWLAEARILARRLTT"
FT repeat_region 2928863..2930236
FT /rpt_family="IS256"
FT /db_xref="ISFinder:ISPsy17"
FT /mobile_element="insertion sequence:ISPsy17"
FT /note="ISPsy17.23"
FT /primary_name="ISPsy17"
FT /synonym="ISPsy18"
FT gene 2928916..2930175
FT /locus_tag="PSPPH_2541"
FT /note="PSPPH2541"
FT CDS 2928916..2930175
FT /locus_tag="PSPPH_2541"
FT /note="identified by match to protein family HMM PF00872"
FT /codon_start=1
FT /transl_table=11
FT /protein_id="AAZ36704.1"
FT /db_xref="GI:71557493"
FT /translation="MPTKKKSANATARELPSIPQELIEQFVKGPMSAEAIQDASMAFK
FT KALIERALGAELGHHLGYPQGAERPEESTNQRNGKSSKTVLTDDGPLRLDIPRDRDGS
FT FAPILIPKHERRFTGFDDKIIAMYARGMTVREIRAFLSEQYGTDVSHDFISSVTDAVM
FT EEVGAWQQRPLEPMYPVIFFDALRVKIRDEGLVCNKAIYLALGVLPDGTRDILGIWIE
FT STEGAKFWMKVFNDLKTRGVEDVLIAVTDGLKGIPEALGAVFPATTLQTCIVHLIRNS
FT LDYAAWDKRRALAKALKPIYQAINADVAEQELNAFEAGPWGKQYPTVVAAWRRAWDRV
FT IPFFVFPAGIRKVVYTTNAIESINAQLRKIIKTRGHFPTDEAATKLIWLGLRNITANW
FT GHAAHDWKVAMNQFAILYGDRFTRPSW"
FT /product="ISPsy17, transposase"
FT repeat_region 2959356..2960533
FT /rpt_family="IS5"
FT /db_xref="ISFinder:ISPsy19"
FT /mobile_element="insertion sequence:ISPsy19"
FT /primary_name="ISPsy19"
FT /note="ISPsy19.18"
FT gene 2959414..2960517
FT /locus_tag="PSPPH_2568"
FT /note="PSPPH2568"
FT CDS 2959414..2960517
FT /locus_tag="PSPPH_2568"
FT /note="identified by match to protein family HMM PF01609"
FT /codon_start=1
FT /transl_table=11
FT /product="ISPsy19, transposase"
FT /protein_id="AAZ35289.1"
FT /db_xref="GI:71556078"
FT /translation="MPKTGRPRSIAAEHYPVLVKLAHAQPYSSQAELALVFFAETGIT
FT AHPDTFAKALKMAGITRVKQRAKGSFQSPEPNKAYGYNETHRRQLPEQLYPSCLTDTE
FT WALVADLFESQGGRGVPPLHSRRTLLEACCYVVRTGCSWRMLPRDFPHWDNVYKTFRR
FT WSAQGKFEQMHDRLRAQWREREERADSPSAAILDSQSTRSSPQGGDSGYDAGKKVKGR
FT KRSLIVDTLGLLLAVSISAASVQDRDAADDAVAYSKEKYPSLSTLFVDSAYAGKWAQR
FT THQLHAIDVQVIRGPNNRRTGQWHSEQGDLFSVEPVQTGFVVMPKRWVVERTHAWNER
FT ARRLIMHHDRLFAVSEAWVWLAEARILARRLTT"
FT repeat_region 3081385..3082562
FT /rpt_family="IS5"
FT /db_xref="ISFinder:ISPsy19"
FT /mobile_element="insertion sequence:ISPsy19"
FT /primary_name="ISPsy19"
FT /note="ISPsy19.19"
FT gene 3081443..3082546
FT /locus_tag="PSPPH_2659"
FT /note="PSPPH2659"
FT CDS 3081443..3082546
FT /locus_tag="PSPPH_2659"
FT /note="identified by match to protein family HMM PF01609"
FT /codon_start=1
FT /transl_table=11
FT /product="ISPsy19, transposase"
FT /protein_id="AAZ33133.1"
FT /db_xref="GI:71553922"
FT /translation="MPKTGRPRSIAAEHYPVLVKLAHAQPYSSQAELALVFFAETGIT
FT AHPDTFAKALKMAGITRVKQRAKGSFQSPEPNKAYGYNETHRRQLPEQLYPSCLTDTE
FT WALVADLFESQGGRGVPPLHSRRTLLEACCYVVRTGCSWRMLPRDFPHWDNVYKTFRR
FT WSAQGKFEQMHDRLRAQWREREERADSPSAAILDSQSTRSSPQGGDSGYDAEKKVKGR
FT KRSLIVDTLGLLLAVSISAASVQDRDAADDAVAYSKEKYPSLSTLFVDSAYAGKWAQR
FT THQLHAIDVQVIRGPNNRRTGQWHSEQGDLFSVEPVQTGFVVMPKRWVVERTHAWNER
FT ARRLIMHHDRLFAVSEAWVWLAEARILARRLTT"
FT repeat_region complement(3161555..3162732)
FT /rpt_family="IS5"
FT /db_xref="ISFinder:ISPsy19"
FT /mobile_element="insertion sequence:ISPsy19"
FT /primary_name="ISPsy19"
FT /note="ISPsy19.20"
FT gene complement(3161571..3162674)
FT /locus_tag="PSPPH_2730"
FT /note="PSPPH2730"
FT CDS complement(3161571..3162674)
FT /locus_tag="PSPPH_2730"
FT /note="identified by match to protein family HMM PF01609"
FT /codon_start=1
FT /transl_table=11
FT /product="ISPsy19, transposase"
FT /protein_id="AAZ35045.1"
FT /db_xref="GI:71555834"
FT /translation="MPKTGRPRSIAAEHYPVLVKLAHAQPYSSQAELALVFFAETGIT
FT AHPDTFAKALKMAGITRVKQRAKGSFQSPEPNKAYGYNETHRRQLPEQLYPSCLTDTE
FT WALVADLFESQGGRGVPPLHSRRTLLEACCYVVRTGCSWRMLPRDFPHWDNVYKTFRR
FT WSAQGKFEQMHDRLRAQWREREERADSPSAAILDSQSTRSSPQGGDSGYDAGKKVKGR
FT KRSLIVDTLGLLLAVSISAASVQDRDAADDAVAYSKEKYPSLSTLFVDSAYAGKWAQR
FT THQLHAIDVQVIRGPNNRRTGQWHSEQGDLFSVEPVQTGFVVMPKRWVVERTHAWNER
FT ARRLIMHHDRLFAVSEAWVWLAEARILARRLTT"
FT repeat_region complement(3203774..3205234)
FT /note="ISPsy16.1"
FT /rpt_family="IS110"
FT /db_xref="ISFinder:ISPsy16"
FT /mobile_element="insertion sequence:ISPsy16"
FT /primary_name="ISPsy16"
FT gene complement(3204091..3205125)
FT /locus_tag="PSPPH_2767"
FT /note="PSPPH2767"
FT CDS complement(3204091..3205125)
FT /locus_tag="PSPPH_2767"
FT /note="identified by match to protein family HMM PF01548;
FT match to protein family HMM PF02371"
FT /codon_start=1
FT /transl_table=11
FT /product="ISPsy16, transposase"
FT /protein_id="AAZ37924.1"
FT /db_xref="GI:71558713"
FT /translation="MPIITVGIDLAKAVFAVHGIDEAGKATLVKPKVARDQLVPLIAQ
FT LPPCLIGMEACSGAHHWARVFAEHGHTVKLMAPKLVSPYRMSGKRGKNDAADAAAICE
FT AVTRPSMRFVPVKDEHQQATLCLHRTRQGFIEERTSTYNRLRGLLSEFGVVLPQSPER
FT LRKEIGPCLDTLPGWARRCMSELLEHTSHIEDRLVELDRAINQIAREDDRSRRLLQLR
FT GVGSTTASALVASIGDGHDFRNGRQVAAWLGLTPGQYSSGGKQRLGSITKAGDAYLRS
FT LLVLGARSVMANLGDKQDPLSRWIRNLIERRGYWRAAVAIAAKNARMAWAVLHYGDTF
FT KPEQAEPTGA"
FT repeat_region 3219183..3220556
FT /rpt_family="IS256"
FT /db_xref="ISFinder:ISPsy17"
FT /mobile_element="insertion sequence:ISPsy17"
FT /note="ISPsy17.24"
FT /primary_name="ISPsy17"
FT /synonym="ISPsy18"
FT gene 3219236..3220495
FT /locus_tag="PSPPH_2782"
FT /note="PSPPH2782"
FT CDS 3219236..3220495
FT /locus_tag="PSPPH_2782"
FT /note="identified by match to protein family HMM PF00872"
FT /codon_start=1
FT /transl_table=11
FT /protein_id="AAZ36721.1"
FT /db_xref="GI:71557510"
FT /translation="MPTKKKSANATARELPSIPQELIEQFVKGPMSAEAIQDASMAFK
FT KALIERALGAELGHHLGYPQGAERPEESTNQRNGKSSKTVLTDDGPLRLDIPRDRDGS
FT FAPILIPKHERRFTGFDDKIIAMYARGMTVREIRAFLSEQYGTDVSHDFISSVTDAVM
FT EEVGAWQQRPLEPMYPVIFFDALRVKIRDEGLVCNKAIYLALGVLPDGTRDILGIWIE
FT STEGAKFWMKVFNDLKTRGVEDVLIAVTDGLKGIPEALGAVFPATTLQTCIVHLIRNS
FT LDYAAWDKRRALAKALKPIYQAINADVAEQELNAFEAGPWGKQYPTVVAAWRRAWDRV
FT IPFFVFPAGIRKVVYTTNAIESINAQLRKIIKTRGHFPTDEAATKLIWLGLRNITANW
FT GHAAHDWKVAMNQFAILYGDRFTRPSW"
FT /product="ISPsy17, transposase"
FT repeat_region join(3238481..3239665,3241048..3241097)
FT /note="ISPsy24.T2"
FT /rpt_family="IS3"
FT /db_xref="ISFinder:ISPsy24"
FT /mobile_element="insertion sequence:ISPsy24"
FT /primary_name="ISPsy24"
FT /color=10
FT repeat_region 3239666..3241039
FT /rpt_family="IS256"
FT /db_xref="ISFinder:ISPsy17"
FT /mobile_element="insertion sequence:ISPsy17"
FT /note="ISPsy17.25"
FT /primary_name="ISPsy17"
FT /synonym="ISPsy18"
FT gene 3239719..3240978
FT /locus_tag="PSPPH_2799"
FT /note="PSPPH2799"
FT CDS 3239719..3240978
FT /locus_tag="PSPPH_2799"
FT /note="identified by match to protein family HMM PF00872"
FT /codon_start=1
FT /transl_table=11
FT /protein_id="AAZ37599.1"
FT /db_xref="GI:71558388"
FT /translation="MPTKKKSANATARELPSIPQELIEQFVKGPMSAEAIQDASMAFK
FT KALIERALGAELGHHLGYPQGAERPEESTNQRNGKSSKTVLTDDGPLRLDIPRDRDGS
FT FAPILIPKHERRFTGFDDKIIAMYARGMTVREIRAFLSEQYGTDVSHDFISSVTDAVM
FT EEVGAWQQRPLEPMYPVIFFDALRVKIRDEGLVCNKAIYLALGVLPDGTRDILGIWIE
FT STEGAKFWMKVFNDLKTRGVEDVLIAVTDGLKGIPEALGAVFPATTLQTCIVHLIRNS
FT LDYAAWDKRRALAKALKPIYQAINADVAEQELNAFEAGPWGKQYPTVVAAWRRAWDRV
FT IPFFVFPAGIRKVVYTTNAIESINAQLRKIIKTRGHFPTDEAATKLIWLGLRNITANW
FT GHAAHDWKVAMNQFAILYGDRFTRPSW"
FT /product="ISPsy17, transposase"
FT repeat_region 3260063..3260372
FT /rpt_family="IS5"
FT /db_xref="ISFinder:ISPsy19"
FT /mobile_element="insertion sequence:ISPsy19"
FT /color=10
FT /primary_name="ISPsy19"
FT /note="ISPsy19.T5"
FT repeat_region complement(3260369..3261048)
FT /rpt_family="IS5"
FT /db_xref="ISFinder:ISPsy2"
FT /mobile_element="insertion sequence:ISPsy2"
FT /note="ISPsy2.T4"
FT /primary_name="ISPsy2"
FT /color=10
FT repeat_region complement(3261052..3262229)
FT /rpt_family="IS5"
FT /db_xref="ISFinder:ISPsy19"
FT /mobile_element="insertion sequence:ISPsy19"
FT /primary_name="ISPsy19"
FT /note="ISPsy19.21"
FT gene complement(3261068..3262171)
FT /locus_tag="PSPPH_2815"
FT /note="PSPPH2815"
FT CDS complement(3261068..3262171)
FT /locus_tag="PSPPH_2815"
FT /note="identified by match to protein family HMM PF01609"
FT /codon_start=1
FT /transl_table=11
FT /product="ISPsy19, transposase"
FT /protein_id="AAZ33484.1"
FT /db_xref="GI:71554273"
FT /translation="MPKTGRPRSIAAEHYPVLVKLAHAQPYSSQAELALVFFAETGIT
FT AHPDTFAKALKMAGITRVKQRAKGSFQSPEPNKAYGYNETHRRQLPEQLYPSCLTDTE
FT WALVADLFESQGGRGVPPLHSRRTLLEACCYVVRTGCSWRMLPRDFPHWDNVYKTFRR
FT WSAQGKFEQMHDRLRAQWREREERADSPSAAILDSQSTRSSPQGGDSGYDAGKKVKGR
FT KRSLIVDTLGLLLAVSISAASVQDRDAADDAVAYSKEKYPSLSTLFVDSAYAGKWAQR
FT THQLHAIDVQVIRGPNNRRTGQWHSEQGDLFSVEPVQTGFVVMPKRWVVERTHAWNER
FT ARRLIMHHDRLFAVSEAWVWLAEARILARRLTT"
FT repeat_region 3394764..3396275
FT /rpt_family="IS91"
FT /db_xref="ISFinder:IS801"
FT /mobile_element="insertion sequence:IS801"
FT /primary_name="IS801"
FT /color=10
FT /note="IS801.T4"
FT /note="Complete element but with a premature stop codon in
FT the transposase gene"
FT repeat_region complement(3459307..3460680)
FT /rpt_family="IS256"
FT /db_xref="ISFinder:ISPsy17"
FT /mobile_element="insertion sequence:ISPsy17"
FT /note="ISPsy17.26"
FT /primary_name="ISPsy17"
FT /synonym="ISPsy18"
FT gene complement(3459368..3460627)
FT /locus_tag="PSPPH_2979"
FT /note="PSPPH2979"
FT CDS complement(3459368..3460627)
FT /locus_tag="PSPPH_2979"
FT /note="identified by match to protein family HMM PF00872"
FT /codon_start=1
FT /transl_table=11
FT /protein_id="AAZ37426.1"
FT /db_xref="GI:71558215"
FT /translation="MPTKKKSANATARELPSIPQELIEQFVKGPMSAEAIQDASMAFK
FT KALIERALGAELGHHLGYPQGAERPEESTNQRNGKSSKTVLTDDGPLRLDIPRDRDGS
FT FAPILIPKHERRFTGFDDKIIAMYARGMTVREIRAFLSEQYGTDVSHDFISSVTDAVM
FT EEVGAWQQRPLEPMYPVIFFDALRVKIRDEGLVCNKAIYLALGVLPDGTRDILGIWIE
FT STEGAKFWMKVFNDLKTRGVEDVLIAVTDGLKGIPEALGAVFPATTLQTCIVHLIRNS
FT LDYAAWDKRRALAKALKPIYQAINADVAEQELNAFEAGPWGKQYPTVVAAWRRAWDRV
FT IPFFVFPAGIRKVVYTTNAIESINAQLRKIIKTRGHFPTDEAATKLIWLGLRNITANW
FT GHAAHDWKVAMNQFAILYGDRFTRPSW"
FT /product="ISPsy17, transposase"
FT repeat_region 3517312..3518819
FT /rpt_family="IS91"
FT /db_xref="ISFinder:IS801"
FT /mobile_element="insertion sequence:IS801"
FT /primary_name="IS801"
FT /color=10
FT /note="IS801.T5"
FT /note="Complete element but with a premature stop codon in
FT the transposase gene"
FT repeat_region complement(3748730..3750103)
FT /rpt_family="IS256"
FT /db_xref="ISFinder:ISPsy17"
FT /mobile_element="insertion sequence:ISPsy17"
FT /note="ISPsy17.27"
FT /primary_name="ISPsy17"
FT /synonym="ISPsy18"
FT gene complement(3748791..3750050)
FT /locus_tag="PSPPH_3234"
FT /note="PSPPH3234"
FT CDS complement(3748791..3750050)
FT /locus_tag="PSPPH_3234"
FT /note="identified by match to protein family HMM PF00872"
FT /codon_start=1
FT /transl_table=11
FT /protein_id="AAZ33708.1"
FT /db_xref="GI:71554497"
FT /translation="MPTKKKSANATARELPSIPQELIEQFVKGPMSAEAIQDASMAFK
FT KALIERALGAELGHHLGYPQGAERPEESTNQRNGKSSKTVLTDDGPLRLDIPRDRDGS
FT FASILIPKHERRFTGFDDKIIAMYARGMTVREIRAFLSEQYGTDVSHDFISSVTDAVM
FT EEVGAWQQRPLEPMYPVIFFDALRVKIRDEGLVCNKAIYLALGVLPDGTRDILGIWIE
FT STEGAKFWMKVFNDLKTRGVEDVLIAVTDGLKGIPEALGAVFPATTLQTCIVHLIRNS
FT LDYAAWDKRRALAKALKPIYQAINADVAEQELNAFEAGPWGKQYPTVVAAWRRAWDRV
FT IPFFVFPAGIRKVVYTTNAIESINAQLRKIIKTRGHFPTDEAATKLIWLGLRNITANW
FT GHAAHDWKVAMNQFAILYGDRFTRPSW"
FT /product="ISPsy17, transposase"
FT repeat_region join(3854346..3855520,3856903..3856922)
FT /note="ISPsy2.T5"
FT /note="Complete but for the insertion in the transposase
FT gene of ISPsy17"
FT /rpt_family="IS5"
FT /db_xref="ISFinder:ISPsy2"
FT /mobile_element="insertion sequence:ISPsy2"
FT /primary_name="ISPsy2"
FT /color=10
FT /synonym="ISPsy18"
FT repeat_region complement(3855521..3856894)
FT /rpt_family="IS256"
FT /db_xref="ISFinder:ISPsy17"
FT /mobile_element="insertion sequence:ISPsy17"
FT /note="ISPsy17.28"
FT /primary_name="ISPsy17"
FT /synonym="ISPsy18"
FT gene complement(3855582..3856841)
FT /locus_tag="PSPPH_3330"
FT /note="PSPPH3330"
FT CDS complement(3855582..3856841)
FT /locus_tag="PSPPH_3330"
FT /note="identified by match to protein family HMM PF00872"
FT /codon_start=1
FT /transl_table=11
FT /protein_id="AAZ35888.1"
FT /db_xref="GI:71556677"
FT /translation="MPTKKKSANATARELPSIPQELIEQFVKGPMSAEAIQDASMAFK
FT KALIERALGAELGHHLGYPQGAERPEESTNQRNGKSSKTVLTDDGPLRLDIPRDRDGS
FT FAPILIPKHERRFTGFDDKIIAMYARGMTVREIRAFLSEQYGTDVSHDFISSVTDAVM
FT EEVGAWQQRPLEPMYPVIFFDALRVKIRDEGLVCNKAIYLALGVLPDGTRDILGIWIE
FT STEGAKFWMKVFNDLKTRGVEDVLIAVTDGLKGIPEALGAVFPATTLQTCIVHLIRNS
FT LDYAAWDKRRALAKALKPIYQAINADVAEQELNAFEAGPWGKQYPTVVAAWRRAWDRV
FT IPFFVFPAGIRKVVYTTNAIESINAQLRKIIKTRGHFPTDEAATKLIWLGLRNITANW
FT GHAAHDWKVAMNQFAILYGDRFTRPSW"
FT /product="ISPsy17, transposase"
FT repeat_region 3976145..3977518
FT /rpt_family="IS256"
FT /db_xref="ISFinder:ISPsy17"
FT /mobile_element="insertion sequence:ISPsy17"
FT /note="ISPsy17.29"
FT /primary_name="ISPsy17"
FT /synonym="ISPsy18"
FT gene 3976198..3977457
FT /locus_tag="PSPPH_3441"
FT /note="PSPPH3441"
FT CDS 3976198..3977457
FT /locus_tag="PSPPH_3441"
FT /note="identified by match to protein family HMM PF00872"
FT /codon_start=1
FT /transl_table=11
FT /protein_id="AAZ37243.1"
FT /db_xref="GI:71558032"
FT /translation="MPTKKKSANATARELPSIPQELIEQFVKGPMSAEAIQDASMAFK
FT KALIERALGAELGHHLGYPQGAERPEESTNQRNGKSSKTVLTDDGPLRLDIPRDRDGS
FT FAPILIPKHERRFTGFDDKIIAMYARGMTVREIRAFLSEQYGTDVSHDFISSVTDAVM
FT EEVGAWQQRPLEPMYPVIFFDALRVKIRDEGLVCNKAIYLALGVLPDGTRDILGIWIE
FT STEGAKFWMKVFNDLKTRGVEDVLIAVTDGLKGIPEALGAVFPATTLQTCIVHLIRNS
FT LDYAAWDKRRALAKALKPIYQAINADVAEQELNAFEAGPWGKQYPTVVAAWRRAWDRV
FT IPFFVFPAGIRKVVYTTNAIESINAQLRKIIKTRGHFPTDEAATKLIWLGLRNITANW
FT GHAAHDWKVAMNQFAILYGDRFTRPSW"
FT /product="ISPsy17, transposase"
FT repeat_region complement(4032160..4032908)
FT /rpt_family="IS256"
FT /db_xref="ISFinder:ISPsy17"
FT /mobile_element="insertion sequence:ISPsy17"
FT /color=10
FT /note="ISPsy17.T7"
FT /primary_name="ISPsy17"
FT /synonym="ISPsy18"
FT repeat_region complement(4033310..4034770)
FT /note="ISPsy16.2"
FT /rpt_family="IS110"
FT /db_xref="ISFinder:ISPsy16"
FT /mobile_element="insertion sequence:ISPsy16"
FT /primary_name="ISPsy16"
FT gene complement(4033627..4034661)
FT /locus_tag="PSPPH_3493"
FT /note="PSPPH3493"
FT CDS complement(4033627..4034661)
FT /locus_tag="PSPPH_3493"
FT /note="identified by match to protein family HMM PF01548;
FT match to protein family HMM PF02371"
FT /codon_start=1
FT /transl_table=11
FT /product="ISPsy16, transposase"
FT /protein_id="AAZ37360.1"
FT /db_xref="GI:71558149"
FT /translation="MPTITVGIDLAKAVFAVHGIDEAGKATLVKPKVARDQLVPLIAQ
FT LPPCLIGMEACSGAHHWARVFAEHGHTVKLMAPKLVSPYRMSGKRGKNDAADAAAICE
FT AVTRPSMRFVPVKDEHQQATLCLHRTRQGFIEERTSTYNRLRGLLSEFGVVLPQSPER
FT LRKEIGPCLDTLPGWARRCMSELLEHTSHIEDRLVELDRAINQIAREDDRSRRLLQLR
FT GVGSTTASALVASIGDGHDFRNGRQVAAWLGLTPGQYSSGGKQRLGSITKAGDAYLRS
FT LLVLGARSVMANLGDKQDPLSRWIRNLIERRGYWRAAVAIAAKNARMAWAVLHYGDTF
FT KPEQAEPTGA"
FT repeat_region complement(4034770..4036066)
FT /note="Unnamed transposase, degenerate; similar to Tn4653
FT transposase, from Pseudomonas putida"
FT /color=10
FT gene complement(4034772..4035985)
FT /locus_tag="PSPPH_3494"
FT /note="PSPPH3494; transposase, authentic frameshift; this
FT gene contains a frame shift which is not the result of
FT sequencing error"
FT /pseudo
FT repeat_region complement(4039296..4039592)
FT /note="Unnamed transposase, degenerate"
FT /note="Similar to IS683, from Pseudomonas syringae pv.
FT syringae"
FT /rpt_family="IS66"
FT /color=10
FT repeat_region 4040788..4041212
FT /note="ISPsy24.T3"
FT /rpt_family="IS3"
FT /db_xref="ISFinder:ISPsy24"
FT /mobile_element="insertion sequence:ISPsy24"
FT /primary_name="ISPsy24"
FT /color=10
FT repeat_region complement(4123815..4125188)
FT /rpt_family="IS256"
FT /db_xref="ISFinder:ISPsy17"
FT /mobile_element="insertion sequence:ISPsy17"
FT /note="ISPsy17.30"
FT /primary_name="ISPsy17"
FT /synonym="ISPsy18"
FT gene complement(4123876..4125135)
FT /locus_tag="PSPPH_3579"
FT /note="PSPPH3579"
FT CDS complement(4123876..4125135)
FT /locus_tag="PSPPH_3579"
FT /note="identified by match to protein family HMM PF00872"
FT /codon_start=1
FT /transl_table=11
FT /protein_id="AAZ35365.1"
FT /db_xref="GI:71556154"
FT /translation="MPTKKKSANATARELPSIPQELIEQFVKGPMSAEAIQDASMAFK
FT KALIERALGAELGHHLGYPQGAERPEESTNQRNGKSSKTVLTDDGPLRLDIPRDRDGS
FT FAPILIPKHERRFTGFDDKIIAMYARGMTVREIRAFLSEQYGTDVSHDFISSVTDAVM
FT EEVGAWQQRPLEPMYPVIFFDALRVKIRDEGLVCNKAIYLALGVLPDGTRDILGIWIE
FT STEGAKFWMKVFNDLKTRGVEDVLIAVTDGLKGIPEALGAVFPATTLQTCIVHLIRNS
FT LDYAAWDKRRALAKALKPIYQAINADVAEQELNAFEAGPWGKQYPTVVAAWRRAWDRV
FT IPFFVFPAGIRKVVYTTNAIESINAQLRKIIKTRGHFPTDEAATKLIWLGLRNITANW
FT GHAAHDWKVAMNQFAILYGDRFTRPSW"
FT /product="ISPsy17, transposase"
FT repeat_region complement(4125802..4126995)
FT /rpt_family="IS5"
FT /db_xref="ISFinder:ISPsy2"
FT /mobile_element="insertion sequence:ISPsy2"
FT /note="ISPsy2.4"
FT /primary_name="ISPsy2"
FT gene complement(4125948..4126928)
FT /locus_tag="PSPPH_3581"
FT /note="PSPPH3581"
FT CDS complement(4125948..4126928)
FT /locus_tag="PSPPH_3581"
FT /note="identified by match to protein family HMM PF01609"
FT /codon_start=1
FT /transl_table=11
FT /product="ISPsy2, transposase"
FT /protein_id="AAZ37025.1"
FT /db_xref="GI:71557814"
FT /translation="MKQMTFADAEYAGKRKQTRKELFLIEMDQVVPWKGLIALIEPYY
FT PKGEGGRPAYPLMAMLRVHLMQNWFGYSDPAMEEALYETTILRQFSGLSLERIPDETT
FT ILNFRRLLEKHELATGILGVINGYLGDHGLSLRQGTIVDATLIHAPSSTKNKDGKRDP
[truncated: 865 more rows]
